# Supplementary material for: Molecular mechanism of Dang-Shen-Yu-Xing decoction against Mycoplasma bovis pneumonia based on network pharmacology, molecular docking, molecular dynamics simulations and experimental verification
Source: Front Vet Sci. 2024 Sep 24;11:1431233. doi: 10.3389/fvets.2024.1431233 (PMC11458528; doi:10.3389/fvets.2024.1431233)
Supplement: Supplementary file 1 [file Table_1.docx]

***Supplementary Material***

Molecular mechanism of Dang-Shen-Yu-Xing decoction against *Mycoplasma bovis* pneumonia based on network pharmacology, molecular docking, molecular dynamics simulations and experimental verification

Mengmeng Yang1,2,3†, Fei Yang1,2†, Yanan Guo2,*, Fan Liu1, Yong Li4, Yanrong Qi5, Lei Guo1, Shenghu He1,*

1College of Animal Science and Technology, Ningxia University, Yinchuan, Ningxia 750021, China

2Institute of Animal Science, Ningxia Academy of Agricultural and Forestry Sciences, Yinchuan, Ningxia 750002, China

3 School of Basic Medicine, Ningxia Medical University, Yinchuan, Ningxia 750001, China

4College of Life Science and Technology, Ningxia Polytechnic, Yinchuan, Ningxia 750001, China

5Agricultural and Rural Bureau of Helan County, Yinchuan, Ningxia 750200, China

*** Correspondence:**Corresponding Author:
1. Yanan Guo

gyn330@126.com

2. Shenghu He

heshenghu308@163.com

†These authors contributed equally.

# Supplementary Tables and Figures

## Supplementary Tables

**Supplementary Table 1.** The results of *Mycoplasma bovis* Ag ELISA kit

| Animal number | OD450nm value | | | Average | ELISA result |
| --- | --- | --- | --- | --- | --- |
| 1 | 0.681 | 0.752 | 0.608 | 0.680 | + |
| 2 | 0.620 | 0.680 | 0.622 | 0.641 | + |
| 3 | 0.623 | 0.674 | 0.592 | 0.630 | + |
| 4 | 0.640 | 0.561 | 0.582 | 0.594 | + |
| 5 | 0.658 | 0.643 | 0.548 | 0.616 | + |
| 6 | 0.606 | 0.633 | 0.515 | 0.585 | + |
| 7 | 0.653 | 0.703 | 0.685 | 0.680 | + |
| 8 | 0.728 | 0.669 | 0.769 | 0.722 | + |
| 9 | 0.676 | 0.662 | 0.549 | 0.629 | + |
| 10 | 0.645 | 0.606 | 0.665 | 0.639 | + |
| 11 | 0.682 | 0.693 | 0.668 | 0.681 | + |
| 12 | 0.652 | 0.600 | 0.674 | 0.642 | + |
| 13 | 0.616 | 0.635 | 0.666 | 0.639 | + |
| 14 | 0.577 | 0.626 | 0.666 | 0.623 | + |
| 15 | 0.683 | 0.585 | 0.659 | 0.642 | + |
| 16 | 0.666 | 0.679 | 0.600 | 0.648 | + |
| 17 | 0.659 | 0.619 | 0.789 | 0.689 | + |
| 18 | 0.600 | 0.662 | 0.564 | 0.609 | + |
| negative | 0.137 | 0.129 | 0.150 | 0.139 | ¬ |
| positive | 1.681 | 0.976 | 0.833 | 1.163 | + |

Notes: cut off = negative average + 0.15；“-” : OD450nm ＜ Cut off; “+” : OD450nm ＞ Cut off.

**Supplementary Table 2.** Primers for qRT-PCR analysis

| Gene name | Forward primer (5’ to 3’) | Reverse primer (5’ to 3’) |
| --- | --- | --- |
| IL6 | CTTCACAAGCGCCTTCACTC | GTCAGAAGTAGTCTGCCTGG |
| IL10 | TGTTGACCCAGTCTCTGCTG | GGCATCACCTCTTCCAGGTA |

**Supplementary Table 3.** Two hundred and seventy-five active components of DSYXD from TCMSP

| Mol ID | Ingredient name | OB | DL |
| --- | --- | --- | --- |
| MOL000098 | quercetin | 46.43 | 0.28 |
| MOL000006 | luteolin | 36.16 | 0.25 |
| MOL000422 | kaempferol | 41.88 | 0.24 |
| MOL000173 | wogonin | 30.68 | 0.23 |
| MOL003896 | 7-Methoxy-2-methyl isoflavone | 42.56 | 0.2 |
| MOL009374 | 7-methoxy-3-methyl-2,5-dihydroxy-9,10-dihydrophenanthrene | 59 | 0.2 |
| MOL004328 | naringenin | 59.29 | 0.21 |
| MOL000392 | formononetin | 69.67 | 0.21 |
| MOL002714 | baicalein | 33.52 | 0.21 |
| MOL002565 | Medicarpin | 49.22 | 0.34 |
| MOL001558 | sesamin | 56.55 | 0.83 |
| MOL000358 | beta-sitosterol | 36.91 | 0.75 |
| MOL000359 | sitosterol | 36.91 | 0.75 |
| MOL000449 | Stigmasterol | 43.83 | 0.76 |
| MOL005360 | malkangunin | 57.71 | 0.63 |
| MOL005384 | suchilactone | 57.52 | 0.56 |
| MOL009361 | 13,15-Dideoxyaconitine | 34.67 | 0.25 |
| MOL009363 | tuberostemonine C | 55.34 | 0.74 |
| MOL009377 | bisdehydroneotuberostemonine | 51.14 | 0.74 |
| MOL009379 | 2-oxostenine | 72.94 | 0.34 |
| MOL009380 | bisdehydrostemoninine | 38.51 | 0.73 |
| MOL009381 | bisdehydrostemoninine A | 62.64 | 0.68 |
| MOL009382 | bisdehydrostemoninine B | 46.05 | 0.64 |
| MOL009386 | 3,3'-bis-(3,4-dihydro-4-hydroxy-6-methoxy)-2H-1-benzopyran | 52.11 | 0.54 |
| MOL009387 | didehydrotuberostemonine | 51.91 | 0.74 |
| MOL009388 | dihydrostemoninine | 68.01 | 0.72 |
| MOL009394 | stemonamine | 45.19 | 0.35 |
| MOL009409 | oxystemoninine | 42.79 | 0.77 |
| MOL009411 | protostemotinine | 45.99 | 0.75 |
| MOL009414 | sessilifoliamide C | 65.87 | 0.2 |
| MOL009419 | sessilifoliamide H | 43.68 | 0.68 |
| MOL009422 | sessilifoline B | 58.81 | 0.29 |
| MOL009423 | sessilistemonamine A | 40.28 | 0.73 |
| MOL009424 | sessilistemonamine B | 40.64 | 0.73 |
| MOL009430 | stemonamide | 67.46 | 0.38 |
| MOL009431 | stemonine | 81.75 | 0.72 |
| MOL009433 | stemoninine B | 74.77 | 0.73 |
| MOL009434 | stemoninoamide | 66.7 | 0.33 |
| MOL009436 | stemotinine | 38.69 | 0.46 |
| MOL009441 | (3S,3'R,4'R,9S,9aS)-4'-hydroxy-3'-methyl-3-[(2S,4S)-4-methyl-5-oxooxolan-2-yl]spiro[1,2,3,5,6,7,8,9a-octahydropyrrolo[1,2-a]azepine-9,5'-oxolane]-2'-one | 85.52 | 0.38 |
| MOL001006 | poriferasta-7,22E-dien-3beta-ol | 42.98 | 0.76 |
| MOL002140 | Perlolyrine | 65.95 | 0.27 |
| MOL002879 | Diop | 43.59 | 0.39 |
| MOL003036 | ZINC03978781 | 43.83 | 0.76 |
| MOL004355 | Spinasterol | 42.98 | 0.76 |
| MOL004492 | Chrysanthemaxanthin | 38.72 | 0.58 |
| MOL005321 | Frutinone A | 65.9 | 0.34 |
| MOL006554 | Taraxerol | 38.4 | 0.77 |
| MOL006774 | stigmast-7-enol | 37.42 | 0.75 |
| MOL007059 | 3-beta-Hydroxymethyllenetanshiquinone | 32.16 | 0.41 |
| MOL007514 | methyl icosa-11,14-dienoate | 39.67 | 0.23 |
| MOL008391 | 5alpha-Stigmastan-3,6-dione | 33.12 | 0.79 |
| MOL008393 | 7-(beta-Xylosyl)cephalomannine_qt | 38.33 | 0.29 |
| MOL008397 | Daturilin | 50.37 | 0.77 |
| MOL008400 | glycitein | 50.48 | 0.24 |
| MOL008406 | Spinoside A | 39.97 | 0.4 |
| MOL008407 | (8S,9S,10R,13R,14S,17R)-17-[(E,2R,5S)-5-ethyl-6-methylhept-3-en-2-yl]-10,13-dimethyl-1,2,4,7,8,9,11,12,14,15,16,17-dodecahydrocyclopenta[a]phenanthren-3-one | 45.4 | 0.76 |
| MOL008411 | 11-Hydroxyrankinidine | 40 | 0.66 |
| MOL001771 | poriferast-5-en-3beta-ol | 36.91 | 0.75 |
| MOL001781 | Indigo | 38.2 | 0.26 |
| MOL001810 | 6-(3-oxoindolin-2-ylidene)indolo[2,1-b]quinazolin-12-one | 45.28 | 0.89 |
| MOL002308 | Indicaxanthin | 31.79 | 0.22 |
| MOL002309 | indirubin | 48.59 | 0.26 |
| MOL002311 | Glycyrol | 90.78 | 0.67 |
| MOL002318 | C05837 | 66.02 | 0.48 |
| MOL002320 | γ-sitosterol | 36.91 | 0.75 |
| MOL002322 | isovitexin | 31.29 | 0.72 |
| MOL000273 | (2R)-2-[(3S,5R,10S,13R,14R,16R,17R)-3,16-dihydroxy-4,4,10,13,14-pentamethyl-2,3,5,6,12,15,16,17-octahydro-1H-cyclopenta[a]phenanthren-17-yl]-6-methylhept-5-enoic acid | 30.93 | 0.81 |
| MOL000275 | trametenolic acid | 38.71 | 0.8 |
| MOL000276 | 7,9(11)-dehydropachymic acid | 35.11 | 0.81 |
| MOL000279 | Cerevisterol | 37.96 | 0.77 |
| MOL000280 | (2R)-2-[(3S,5R,10S,13R,14R,16R,17R)-3,16-dihydroxy-4,4,10,13,14-pentamethyl-2,3,5,6,12,15,16,17-octahydro-1H-cyclopenta[a]phenanthren-17-yl]-5-isopropyl-hex-5-enoic acid | 31.07 | 0.82 |
| MOL000282 | ergosta-7,22E-dien-3beta-ol | 43.51 | 0.72 |
| MOL000283 | Ergosterol peroxide | 40.36 | 0.81 |
| MOL000285 | (2R)-2-[(5R,10S,13R,14R,16R,17R)-16-hydroxy-3-keto-4,4,10,13,14-pentamethyl-1,2,5,6,12,15,16,17-octahydrocyclopenta[a]phenanthren-17-yl]-5-isopropyl-hex-5-enoic acid | 38.26 | 0.82 |
| MOL000287 | 3beta-Hydroxy-24-methylene-8-lanostene-21-oic acid | 38.7 | 0.81 |
| MOL000289 | pachymic acid | 33.63 | 0.81 |
| MOL000290 | Poricoic acid A | 30.61 | 0.76 |
| MOL000291 | Poricoic acid B | 30.52 | 0.75 |
| MOL000292 | poricoic acid C | 38.15 | 0.75 |
| MOL000296 | hederagenin | 36.91 | 0.75 |
| MOL000300 | dehydroeburicoic acid | 44.17 | 0.83 |
| MOL001484 | Inermine | 75.18 | 0.54 |
| MOL001792 | DFV | 32.76 | 0.18 |
| MOL000211 | Mairin | 55.38 | 0.78 |
| MOL000239 | Jaranol | 50.83 | 0.29 |
| MOL000354 | isorhamnetin | 49.6 | 0.31 |
| MOL003656 | Lupiwighteone | 51.64 | 0.37 |
| MOL000417 | Calycosin | 47.75 | 0.24 |
| MOL004805 | (2S)-2-[4-hydroxy-3-(3-methylbut-2-enyl)phenyl]-8,8-dimethyl-2,3-dihydropyrano[2,3-f]chromen-4-one | 31.79 | 0.72 |
| MOL004806 | euchrenone | 30.29 | 0.57 |
| MOL004808 | glyasperin B | 65.22 | 0.44 |
| MOL004810 | glyasperin F | 75.84 | 0.54 |
| MOL004811 | Glyasperin C | 45.56 | 0.4 |
| MOL004814 | Isotrifoliol | 31.94 | 0.42 |
| MOL004815 | (E)-1-(2,4-dihydroxyphenyl)-3-(2,2-dimethylchromen-6-yl)prop-2-en-1-one | 39.62 | 0.35 |
| MOL004820 | kanzonols W | 50.48 | 0.52 |
| MOL004824 | (2S)-6-(2,4-dihydroxyphenyl)-2-(2-hydroxypropan-2-yl)-4-methoxy-2,3-dihydrofuro[3,2-g]chromen-7-one | 60.25 | 0.63 |
| MOL004827 | Semilicoisoflavone B | 48.78 | 0.55 |
| MOL004828 | Glepidotin A | 44.72 | 0.35 |
| MOL004829 | Glepidotin B | 64.46 | 0.34 |
| MOL004833 | Phaseolinisoflavan | 32.01 | 0.45 |
| MOL004835 | Glypallichalcone | 61.6 | 0.19 |
| MOL004838 | 8-(6-hydroxy-2-benzofuranyl)-2,2-dimethyl-5-chromenol | 58.44 | 0.38 |
| MOL004841 | Licochalcone B | 76.76 | 0.19 |
| MOL004848 | licochalcone G | 49.25 | 0.32 |
| MOL004849 | 3-(2,4-dihydroxyphenyl)-8-(1,1-dimethylprop-2-enyl)-7-hydroxy-5-methoxy-coumarin | 59.62 | 0.43 |
| MOL004855 | Licoricone | 63.58 | 0.47 |
| MOL004856 | Gancaonin A | 51.08 | 0.4 |
| MOL004857 | Gancaonin B | 48.79 | 0.45 |
| MOL004860 | licorice glycoside E | 32.89 | 0.27 |
| MOL004863 | 3-(3,4-dihydroxyphenyl)-5,7-dihydroxy-8-(3-methylbut-2-enyl)chromone | 66.37 | 0.41 |
| MOL004864 | 5,7-dihydroxy-3-(4-methoxyphenyl)-8-(3-methylbut-2-enyl)chromone | 30.49 | 0.41 |
| MOL004866 | 2-(3,4-dihydroxyphenyl)-5,7-dihydroxy-6-(3-methylbut-2-enyl)chromone | 44.15 | 0.41 |
| MOL004879 | Glycyrin | 52.61 | 0.47 |
| MOL004882 | Licocoumarone | 33.21 | 0.36 |
| MOL004883 | Licoisoflavone | 41.61 | 0.42 |
| MOL004884 | Licoisoflavone B | 38.93 | 0.55 |
| MOL004885 | licoisoflavanone | 52.47 | 0.54 |
| MOL004891 | shinpterocarpin | 80.3 | 0.73 |
| MOL004898 | (E)-3-[3,4-dihydroxy-5-(3-methylbut-2-enyl)phenyl]-1-(2,4-dihydroxyphenyl)prop-2-en-1-one | 46.27 | 0.31 |
| MOL004903 | liquiritin | 65.69 | 0.74 |
| MOL004904 | licopyranocoumarin | 80.36 | 0.65 |
| MOL004905 | 3,22-Dihydroxy-11-oxo-delta(12)-oleanene-27-alpha-methoxycarbonyl-29-oic acid | 34.32 | 0.55 |
| MOL004907 | Glyzaglabrin | 61.07 | 0.35 |
| MOL004908 | Glabridin | 53.25 | 0.47 |
| MOL004910 | Glabranin | 52.9 | 0.31 |
| MOL004911 | Glabrene | 46.27 | 0.44 |
| MOL004912 | Glabrone | 52.51 | 0.5 |
| MOL004913 | 1,3-dihydroxy-9-methoxy-6-benzofurano[3,2-c]chromenone | 48.14 | 0.43 |
| MOL004914 | 1,3-dihydroxy-8,9-dimethoxy-6-benzofurano[3,2-c]chromenone | 62.9 | 0.53 |
| MOL004915 | Eurycarpin A | 43.28 | 0.37 |
| MOL004917 | glycyroside | 37.25 | 0.79 |
| MOL004924 | (-)-Medicocarpin | 40.99 | 0.95 |
| MOL004935 | Sigmoidin-B | 34.88 | 0.41 |
| MOL004941 | (2R)-7-hydroxy-2-(4-hydroxyphenyl)chroman-4-one | 71.12 | 0.18 |
| MOL004945 | (2S)-7-hydroxy-2-(4-hydroxyphenyl)-8-(3-methylbut-2-enyl)chroman-4-one | 36.57 | 0.32 |
| MOL004948 | Isoglycyrol | 44.7 | 0.84 |
| MOL004949 | Isolicoflavonol | 45.17 | 0.42 |
| MOL004957 | HMO | 38.37 | 0.21 |
| MOL004959 | 1-Methoxyphaseollidin | 69.98 | 0.64 |
| MOL004961 | Quercetin der. | 46.45 | 0.33 |
| MOL004966 | 3'-Hydroxy-4'-O-Methylglabridin | 43.71 | 0.57 |
| MOL000497 | licochalcone a | 40.79 | 0.29 |
| MOL004974 | 3'-Methoxyglabridin | 46.16 | 0.57 |
| MOL004978 | 2-[(3R)-8,8-dimethyl-3,4-dihydro-2H-pyrano[6,5-f]chromen-3-yl]-5-methoxyphenol | 36.21 | 0.52 |
| MOL004980 | Inflacoumarin A | 39.71 | 0.33 |
| MOL004985 | icos-5-enoic acid | 30.7 | 0.2 |
| MOL004988 | Kanzonol F | 32.47 | 0.89 |
| MOL004989 | 6-prenylated eriodictyol | 39.22 | 0.41 |
| MOL004990 | 7,2',4'-trihydroxy－5-methoxy-3－arylcoumarin | 83.71 | 0.27 |
| MOL004991 | 7-Acetoxy-2-methylisoflavone | 38.92 | 0.26 |
| MOL004993 | 8-prenylated eriodictyol | 53.79 | 0.4 |
| MOL004996 | gadelaidic acid | 30.7 | 0.2 |
| MOL000500 | Vestitol | 74.66 | 0.21 |
| MOL005000 | Gancaonin G | 60.44 | 0.39 |
| MOL005001 | Gancaonin H | 50.1 | 0.78 |
| MOL005003 | Licoagrocarpin | 58.81 | 0.58 |
| MOL005007 | Glyasperins M | 72.67 | 0.59 |
| MOL005008 | Glycyrrhiza flavonol A | 41.28 | 0.6 |
| MOL005012 | Licoagroisoflavone | 57.28 | 0.49 |
| MOL005013 | 18α-hydroxyglycyrrhetic acid | 41.16 | 0.71 |
| MOL005016 | Odoratin | 49.95 | 0.3 |
| MOL005017 | Phaseol | 78.77 | 0.58 |
| MOL005018 | Xambioona | 54.85 | 0.87 |
| MOL005020 | dehydroglyasperins C | 53.82 | 0.37 |
| MOL001454 | berberine | 36.86 | 0.78 |
| MOL001458 | coptisine | 30.67 | 0.86 |
| MOL002636 | Kihadalactone A | 34.21 | 0.82 |
| MOL013352 | Obacunone | 43.29 | 0.77 |
| MOL002641 | Phellavin_qt | 35.86 | 0.44 |
| MOL002643 | delta 7-stigmastenol | 37.42 | 0.75 |
| MOL002644 | Phellopterin | 40.19 | 0.28 |
| MOL002651 | Dehydrotanshinone II A | 43.76 | 0.4 |
| MOL002652 | delta7-Dehydrosophoramine | 54.45 | 0.25 |
| MOL002656 | dihydroniloticin | 36.43 | 0.81 |
| MOL002659 | kihadanin A | 31.6 | 0.7 |
| MOL002660 | niloticin | 41.41 | 0.82 |
| MOL002662 | rutaecarpine | 40.3 | 0.6 |
| MOL002663 | Skimmianin | 40.14 | 0.2 |
| MOL002666 | Chelerythrine | 34.18 | 0.78 |
| MOL002668 | Worenine | 45.83 | 0.87 |
| MOL002670 | Cavidine | 35.64 | 0.81 |
| MOL002671 | Candletoxin A | 31.81 | 0.69 |
| MOL002672 | Hericenone H | 39 | 0.63 |
| MOL002673 | Hispidone | 36.18 | 0.83 |
| MOL000622 | Magnograndiolide | 63.71 | 0.19 |
| MOL000762 | Palmidin A | 35.36 | 0.65 |
| MOL000785 | palmatine | 64.6 | 0.65 |
| MOL000787 | Fumarine | 59.26 | 0.83 |
| MOL000790 | Isocorypalmine | 35.77 | 0.59 |
| MOL001131 | phellamurin_qt | 56.6 | 0.39 |
| MOL001455 | (S)-Canadine | 53.83 | 0.77 |
| MOL002894 | berberrubine | 35.74 | 0.73 |
| MOL005438 | campesterol | 37.58 | 0.71 |
| MOL006401 | melianone | 40.53 | 0.78 |
| MOL006413 | phellochin | 35.41 | 0.82 |
| MOL006422 | thalifendine | 44.41 | 0.73 |
| MOL002897 | epiberberine | 43.09 | 0.78 |
| MOL002903 | (R)-Canadine | 55.37 | 0.77 |
| MOL002904 | Berlambine | 36.68 | 0.82 |
| MOL002907 | Corchoroside A_qt | 104.95 | 0.78 |
| MOL008647 | Moupinamide | 86.71 | 0.26 |
| MOL001689 | acacetin | 34.97 | 0.24 |
| MOL000228 | (2R)-7-hydroxy-5-methoxy-2-phenylchroman-4-one | 55.23 | 0.2 |
| MOL002908 | 5,8,2'-Trihydroxy-7-methoxyflavone | 37.01 | 0.27 |
| MOL002909 | 5,7,2,5-tetrahydroxy-8,6-dimethoxyflavone | 33.82 | 0.45 |
| MOL002910 | Carthamidin | 41.15 | 0.24 |
| MOL002911 | 2,6,2',4'-tetrahydroxy-6'-methoxychaleone | 69.04 | 0.22 |
| MOL002913 | Dihydrobaicalin_qt | 40.04 | 0.21 |
| MOL002914 | Eriodyctiol (flavanone) | 41.35 | 0.24 |
| MOL002915 | Salvigenin | 49.07 | 0.33 |
| MOL002917 | 5,2',6'-Trihydroxy-7,8-dimethoxyflavone | 45.05 | 0.33 |
| MOL002925 | 5,7,2',6'-Tetrahydroxyflavone | 37.01 | 0.24 |
| MOL002926 | dihydrooroxylin A | 38.72 | 0.23 |
| MOL002927 | Skullcapflavone II | 69.51 | 0.44 |
| MOL002928 | oroxylin a | 41.37 | 0.23 |
| MOL002932 | Panicolin | 76.26 | 0.29 |
| MOL002933 | 5,7,4'-Trihydroxy-8-methoxyflavone | 36.56 | 0.27 |
| MOL002934 | NEOBAICALEIN | 104.34 | 0.44 |
| MOL002937 | DIHYDROOROXYLIN | 66.06 | 0.23 |
| MOL000525 | Norwogonin | 39.4 | 0.21 |
| MOL000552 | 5,2'-Dihydroxy-6,7,8-trimethoxyflavone | 31.71 | 0.35 |
| MOL000073 | ent-Epicatechin | 48.96 | 0.24 |
| MOL001490 | bis[(2S)-2-ethylhexyl] benzene-1,2-dicarboxylate | 43.59 | 0.35 |
| MOL001506 | Supraene | 33.55 | 0.42 |
| MOL008206 | Moslosooflavone | 44.09 | 0.25 |
| MOL010415 | 11,13-Eicosadienoic acid, methyl ester | 39.28 | 0.23 |
| MOL012245 | 5,7,4'-trihydroxy-6-methoxyflavanone | 36.63 | 0.27 |
| MOL012246 | 5,7,4'-trihydroxy-8-methoxyflavanone | 74.24 | 0.26 |
| MOL012266 | rivularin | 37.94 | 0.37 |
| MOL001040 | (2R)-5,7-dihydroxy-2-(4-hydroxyphenyl)chroman-4-one | 42.36 | 0.21 |
| MOL003542 | 8-Isopentenyl-kaempferol | 38.04 | 0.39 |
| MOL003627 | sophocarpine | 64.26 | 0.25 |
| MOL003648 | Inermin | 65.83 | 0.54 |
| MOL003673 | Wighteone | 42.8 | 0.36 |
| MOL003676 | Sophoramine | 42.16 | 0.25 |
| MOL003680 | sophoridine | 60.07 | 0.25 |
| MOL004580 | cis-Dihydroquercetin | 66.44 | 0.27 |
| MOL005100 | 5,7-dihydroxy-2-(3-hydroxy-4-methoxyphenyl)chroman-4-one | 47.74 | 0.27 |
| MOL005944 | matrine | 63.77 | 0.25 |
| MOL006561 | (+)-14alpha-hydroxymatrine | 35.73 | 0.29 |
| MOL006562 | (+)-7,11-dehydromatrine,(leontalbinine) | 62.08 | 0.25 |
| MOL006563 | (+)-9alpha-hydroxymatrine | 32.04 | 0.29 |
| MOL006564 | (+)-allomatrine | 58.87 | 0.25 |
| MOL006565 | AIDS211310 | 68.68 | 0.25 |
| MOL006566 | (+)-lehmannine | 58.34 | 0.25 |
| MOL006568 | isosophocarpine | 61.57 | 0.25 |
| MOL006569 | (-)-14beta-hydroxymatrine | 37.26 | 0.29 |
| MOL006570 | (-)-9alpha-hydroxysophoramine | 35.23 | 0.29 |
| MOL006571 | anagyrine | 62.01 | 0.24 |
| MOL006572 | 1,4-diazaindan-type,alkaloid,flavascensine | 34.64 | 0.24 |
| MOL006573 | 13,14-dehydrosophoridine | 65.34 | 0.25 |
| MOL006582 | 5α,9α-dihydroxymatrine | 40.93 | 0.32 |
| MOL006583 | 7,11-dehydromatrine | 44.43 | 0.25 |
| MOL006596 | Glyceollin | 97.27 | 0.76 |
| MOL003347 | hyperforin | 44.03 | 0.6 |
| MOL006604 | (2S)-7-hydroxy-2-(4-hydroxyphenyl)-5-methoxy-8-(3-methylbut-2-enyl)chroman-4-one | 48.09 | 0.39 |
| MOL006613 | kushenin | 47.62 | 0.38 |
| MOL006619 | kushenol J | 51.39 | 0.74 |
| MOL006620 | kushenol J_qt | 50.86 | 0.24 |
| MOL006622 | kushenol O | 42.41 | 0.76 |
| MOL006623 | kushenol,t | 51.28 | 0.64 |
| MOL006626 | leachianone,g | 60.97 | 0.4 |
| MOL006627 | Lehmanine | 62.23 | 0.25 |
| MOL006628 | (+)-Lupanine | 52.71 | 0.24 |
| MOL006630 | Norartocarpetin | 54.93 | 0.24 |
| MOL000456 | Phaseolin | 78.2 | 0.73 |
| MOL006649 | sophranol | 55.42 | 0.28 |
| MOL006650 | (-)-Maackiain-3-O-glucosyl-6'-O-malonate | 48.69 | 0.52 |
| MOL006652 | trifolrhizin | 48.53 | 0.74 |
| MOL003851 | Isoramanone | 39.97 | 0.51 |
| MOL004345 | 1-methyl-2-nonacosyl-4-quinolone | 31.54 | 0.5 |
| MOL004350 | Ruvoside_qt | 36.12 | 0.76 |
| MOL004351 | C09747 | 37.28 | 0.25 |

**Supplementary Table 4.** One hundred and forty-nine targets of DSYXD

| NO. | Target |
| --- | --- |
| 1 | PTGS2 |
| 2 | CCND1 |
| 3 | IL10 |
| 4 | FASN |
| 5 | ACACA |
| 6 | NOS3 |
| 7 | ECE1 |
| 8 | ACADM |
| 9 | ACOX1 |
| 10 | ACLY |
| 11 | HADHB |
| 12 | PTGS1 |
| 13 | HSP90AB1 |
| 14 | DRD1 |
| 15 | CHRM3 |
| 16 | CHRM4 |
| 17 | ADRA1A |
| 18 | CHRM2 |
| 19 | ADRB2 |
| 20 | SLC6A4 |
| 21 | OPRM1 |
| 22 | GABRA1 |
| 23 | BCL2 |
| 24 | BAX |
| 25 | CASP3 |
| 26 | PRKCA |
| 27 | NOS2 |
| 28 | ESR1 |
| 29 | PPARG |
| 30 | SLC6A3 |
| 31 | ESR2 |
| 32 | DPP4 |
| 33 | CDK2 |
| 34 | MAOB |
| 35 | CCNA2 |
| 36 | CALM |
| 37 | PKIA |
| 38 | ACHE |
| 39 | DPEP1 |
| 40 | IL4 |
| 41 | ATP5F1B |
| 42 | ADRA2A |
| 43 | SLC6A2 |
| 44 | AKR1B1 |
| 45 | PLAU |
| 46 | LTA4H |
| 47 | MAOA |
| 48 | ADRB1 |
| 49 | F7 |
| 50 | DRD2 |
| 51 | AKT1 |
| 52 | VEGFA |
| 53 | MMP2 |
| 54 | MMP9 |
| 55 | MAPK1 |
| 56 | CDK4 |
| 57 | TNF |
| 58 | IL6 |
| 59 | TP53 |
| 60 | APP |
| 61 | MMP1 |
| 62 | PCNA |
| 63 | HMOX1 |
| 64 | ICAM1 |
| 65 | BIRC5 |
| 66 | IL2 |
| 67 | CCNB1 |
| 68 | TYR |
| 69 | IFNG |
| 70 | GSTP1 |
| 71 | SLC2A4 |
| 72 | CD40LG |
| 73 | PTGES |
| 74 | MET |
| 75 | CA2 |
| 76 | MMP13 |
| 77 | CCL5 |
| 78 | IKBKB |
| 79 | LYZ1 |
| 80 | PYGM |
| 81 | NCF1 |
| 82 | OLR1 |
| 83 | CDK1 |
| 84 | SELE |
| 85 | HAS2 |
| 86 | PSMD3 |
| 87 | PPP3CA |
| 88 | GSTM1 |
| 89 | LDLR |
| 90 | SOD1 |
| 91 | CAT |
| 92 | MTTP |
| 93 | HMGCR |
| 94 | CYP19A1 |
| 95 | ABCC1 |
| 96 | ADIPOQ |
| 97 | GOT1 |
| 98 | ABAT |
| 99 | BACE1 |
| 100 | STAT3 |
| 101 | EIF6 |
| 102 | POR |
| 103 | ODC1 |
| 104 | RAF1 |
| 105 | HIF1A |
| 106 | HSPA5 |
| 107 | CAV1 |
| 108 | MYC |
| 109 | F3 |
| 110 | GJA1 |
| 111 | IL1B |
| 112 | CCL2 |
| 113 | PTGER3 |
| 114 | CXCL8 |
| 115 | PRKCB |
| 116 | HSPB1 |
| 117 | SULT1E1 |
| 118 | PLAT |
| 119 | THBD |
| 120 | SERPINE1 |
| 121 | COL1A1 |
| 122 | IL1A |
| 123 | ABCG2 |
| 124 | NFE2L2 |
| 125 | PARP1 |
| 126 | COL3A1 |
| 127 | CXCL11 |
| 128 | CLDN4 |
| 129 | HSF1 |
| 130 | CXCL10 |
| 131 | CHUK |
| 132 | SPP1 |
| 133 | ACP3 |
| 134 | CTSD |
| 135 | IGFBP3 |
| 136 | IGF2 |
| 137 | IRF1 |
| 138 | RASA1 |
| 139 | DRD5 |
| 140 | ADRA2B |
| 141 | FN1 |
| 142 | CYCS |
| 143 | NFATC1 |
| 144 | TDRD7 |
| 145 | FABP5 |
| 146 | APOD |
| 147 | HPSE |
| 148 | IER3IP1 |
| 149 | CD44 |

**Supplementary Table 5.** One hundred and thirty-eight targets of DSYXD-*Mycoplasma bovis* pneumonia

| NO | Target |
| --- | --- |
| 1 | CCND1 |
| 2 | IL10 |
| 3 | FASN |
| 4 | ACACA |
| 5 | NOS3 |
| 6 | ECE1 |
| 7 | ACOX1 |
| 8 | ACLY |
| 9 | PTGS1 |
| 10 | PTGS2 |
| 11 | HSP90AB1 |
| 12 | DRD1 |
| 13 | CHRM3 |
| 14 | CHRM4 |
| 15 | ADRA1A |
| 16 | CHRM2 |
| 17 | ADRB2 |
| 18 | SLC6A4 |
| 19 | OPRM1 |
| 20 | GABRA1 |
| 21 | BCL2 |
| 22 | BAX |
| 23 | CASP3 |
| 24 | PRKCA |
| 25 | NOS2 |
| 26 | ESR1 |
| 27 | PPARG |
| 28 | SLC6A3 |
| 29 | ESR2 |
| 30 | DPP4 |
| 31 | CDK2 |
| 32 | MAOB |
| 33 | CCNA2 |
| 34 | PKIA |
| 35 | ACHE |
| 36 | DPEP1 |
| 37 | IL4 |
| 38 | ATP5F1B |
| 39 | ADRA2A |
| 40 | SLC6A2 |
| 41 | AKR1B1 |
| 42 | PLAU |
| 43 | LTA4H |
| 44 | MAOA |
| 45 | ADRB1 |
| 46 | F7 |
| 47 | DRD2 |
| 48 | AKT1 |
| 49 | VEGFA |
| 50 | MMP2 |
| 51 | MMP9 |
| 52 | MAPK1 |
| 53 | CDK4 |
| 54 | TNF |
| 55 | IL6 |
| 56 | TP53 |
| 57 | APP |
| 58 | MMP1 |
| 59 | PCNA |
| 60 | HMOX1 |
| 61 | ICAM1 |
| 62 | BIRC5 |
| 63 | IL2 |
| 64 | CCNB1 |
| 65 | TYR |
| 66 | IFNG |
| 67 | GSTP1 |
| 68 | SLC2A4 |
| 69 | CD40LG |
| 70 | PTGES |
| 71 | MET |
| 72 | CA2 |
| 73 | MMP13 |
| 74 | CCL5 |
| 75 | IKBKB |
| 76 | PYGM |
| 77 | NCF1 |
| 78 | OLR1 |
| 79 | CDK1 |
| 80 | SELE |
| 81 | HAS2 |
| 82 | PPP3CA |
| 83 | GSTM1 |
| 84 | LDLR |
| 85 | SOD1 |
| 86 | CAT |
| 87 | MTTP |
| 88 | HMGCR |
| 89 | CYP19A1 |
| 90 | ABCC1 |
| 91 | ADIPOQ |
| 92 | GOT1 |
| 93 | BACE1 |
| 94 | STAT3 |
| 95 | POR |
| 96 | ODC1 |
| 97 | RAF1 |
| 98 | HIF1A |
| 99 | HSPA5 |
| 100 | CAV1 |
| 101 | MYC |
| 102 | F3 |
| 103 | GJA1 |
| 104 | IL1B |
| 105 | CCL2 |
| 106 | PTGER3 |
| 107 | CXCL8 |
| 108 | HSPB1 |
| 109 | SULT1E1 |
| 110 | PLAT |
| 111 | THBD |
| 112 | SERPINE1 |
| 113 | COL1A1 |
| 114 | IL1A |
| 115 | ABCG2 |
| 116 | NFE2L2 |
| 117 | PARP1 |
| 118 | COL3A1 |
| 119 | CXCL11 |
| 120 | CLDN4 |
| 121 | HSF1 |
| 122 | CXCL10 |
| 123 | CHUK |
| 124 | SPP1 |
| 125 | CTSD |
| 126 | IGFBP3 |
| 127 | IGF2 |
| 128 | IRF1 |
| 129 | RASA1 |
| 130 | DRD5 |
| 131 | ADRA2B |
| 132 | FN1 |
| 133 | CYCS |
| 134 | NFATC1 |
| 135 | TDRD7 |
| 136 | FABP5 |
| 137 | IER3IP1 |
| 138 | CD44 |

**Supplementary Table 6.** Topological parameter information for PPI

| NO | name | Betweenness | Closeness | Degree | Eigenvector | LAC | Network |
| --- | --- | --- | --- | --- | --- | --- | --- |
| 1 | TNF | 1296.308153 | 0.041483651 | 17 | 0.194899485 | 2.235294118 | 11.7047619 |
| 2 | AKT1 | 544.1088745 | 0.041483651 | 11 | 0.23610267 | 1.818181818 | 4.430555556 |
| 3 | TP53 | 575.7476912 | 0.041282176 | 11 | 0.251334786 | 1.272727273 | 3.73015873 |
| 4 | ESR1 | 420.4325397 | 0.04136253 | 10 | 0.260091007 | 2.6 | 6.041666667 |
| 5 | CCND1 | 317.7865079 | 0.041142304 | 9 | 0.316856474 | 3.333333333 | 5.163095238 |
| 6 | STAT3 | 969.4188312 | 0.041789577 | 9 | 0.255975872 | 2.222222222 | 3.160714286 |
| 7 | MAPK1 | 638.6628427 | 0.041524182 | 9 | 0.195646286 | 1.333333333 | 2.833333333 |
| 8 | CCNA2 | 70.35079365 | 0.040786948 | 8 | 0.267974198 | 4.25 | 6.523809524 |
| 9 | IL10 | 295.6637807 | 0.041382668 | 8 | 0.16108878 | 3.25 | 5.580952381 |
| 10 | IL6 | 312.8196248 | 0.041443198 | 8 | 0.162349537 | 3 | 5.171428571 |
| 11 | CDK1 | 52.28888889 | 0.040767386 | 7 | 0.243592024 | 3.714285714 | 4.933333333 |
| 12 | CDK2 | 42.93015873 | 0.040553435 | 7 | 0.251723528 | 4.285714286 | 5.633333333 |
| 13 | CD44 | 673.2666667 | 0.041082649 | 7 | 0.057748448 | 0.285714286 | 1.333333333 |
| 14 | CASP3 | 790.8845599 | 0.041544477 | 6 | 0.127337605 | 0 | 0 |
| 15 | CCNB1 | 13.54285714 | 0.04005655 | 6 | 0.193830281 | 3.666666667 | 4.816666667 |
| 16 | CXCL8 | 30.41645022 | 0.040669856 | 6 | 0.111104384 | 2.666666667 | 3.8 |
| 17 | PCNA | 7.176984127 | 0.040227165 | 6 | 0.21892184 | 4.333333333 | 5.4 |
| 18 | IL1B | 74.21139971 | 0.040845747 | 6 | 0.117262252 | 3 | 4.333333333 |
| 19 | MYC | 11.7452381 | 0.0411224 | 5 | 0.190087095 | 3.2 | 4 |
| 20 | HIF1A | 246.674531 | 0.041162228 | 5 | 0.123578534 | 0.8 | 1.75 |
| 21 | CDK4 | 6.776984127 | 0.040208136 | 5 | 0.187184691 | 3.6 | 4.5 |
| 22 | BCL2 | 31.69047619 | 0.040669856 | 4 | 0.081528723 | 1.5 | 2.5 |
| 23 | BIRC5 | 127.6793651 | 0.040669856 | 4 | 0.124774121 | 1.5 | 2 |
| 24 | CXCL10 | 124.6666667 | 0.040341718 | 4 | 0.046042498 | 1 | 1.666666667 |
| 25 | IL4 | 124 | 0.040572792 | 4 | 0.066347376 | 1.5 | 2 |
| 26 | FN1 | 136.5880952 | 0.040075436 | 4 | 0.01403172 | 0.5 | 1.333333333 |
| 27 | IFNG | 2.066666667 | 0.040630975 | 4 | 0.089211419 | 2.5 | 3.333333333 |
| 28 | IL2 | 1.333333333 | 0.040572792 | 4 | 0.076684684 | 2.5 | 3.333333333 |
| 29 | PTGS2 | 328.3275613 | 0.041003377 | 4 | 0.081533358 | 0.5 | 0.666666667 |
| 30 | CAV1 | 0 | 0.040534096 | 3 | 0.087864161 | 2 | 3 |
| 31 | NOS3 | 0 | 0.040534096 | 3 | 0.087864161 | 2 | 3 |
| 32 | BAX | 12.03809524 | 0.04041845 | 3 | 0.055956554 | 1.333333333 | 2 |
| 33 | CYCS | 51.80714286 | 0.040514776 | 3 | 0.039791636 | 0.666666667 | 1 |
| 34 | CCL2 | 1.333333333 | 0.040322581 | 3 | 0.052753091 | 1.333333333 | 2 |
| 35 | CCL5 | 1.333333333 | 0.040322581 | 3 | 0.052753091 | 1.333333333 | 2 |
| 36 | MMP9 | 131.4380952 | 0.04005655 | 3 | 0.012365118 | 0 | 0 |
| 37 | VEGFA | 97.41666667 | 0.040208136 | 3 | 0.022561818 | 0 | 0 |
| 38 | IL1A | 0 | 0.040611562 | 3 | 0.07113608 | 2 | 3 |
| 39 | PRKCA | 135.9666667 | 0.040437678 | 3 | 0.036425024 | 0 | 0 |
| 40 | ACACA | 0 | 0.011904762 | 2 | 0 | 1 | 2 |
| 41 | FASN | 0 | 0.011904762 | 2 | 0 | 1 | 2 |
| 42 | ACLY | 0 | 0.011904762 | 2 | 0 | 1 | 2 |
| 43 | APP | 2 | 0.011904762 | 2 | 0 | 0 | 0 |
| 44 | PPARG | 124 | 0.040303461 | 2 | 0.029873218 | 0 | 0 |
| 45 | RAF1 | 20.9047619 | 0.04041845 | 2 | 0.041000448 | 0 | 0 |
| 46 | MET | 36.01031746 | 0.040572792 | 2 | 0.044201843 | 0 | 0 |
| 47 | PARP1 | 13.63189033 | 0.040845747 | 2 | 0.056858521 | 0 | 0 |
| 48 | CAT | 4 | 0.012046485 | 2 | 0 | 0 | 0 |
| 49 | HMOX1 | 4 | 0.012046485 | 2 | 0 | 0 | 0 |
| 50 | ICAM1 | 210.5531746 | 0.040826129 | 2 | 0.037891179 | 0 | 0 |
| 51 | SPP1 | 0 | 0.039943609 | 2 | 0.010803161 | 1 | 2 |
| 52 | CHUK | 0 | 0.04028436 | 2 | 0.034350943 | 1 | 2 |
| 53 | IKBKB | 0 | 0.04028436 | 2 | 0.034350943 | 1 | 2 |
| 54 | COL1A1 | 2 | 0.011904762 | 2 | 0 | 0 | 0 |
| 55 | CYP19A1 | 124 | 0.040189125 | 2 | 0.040026423 | 0 | 0 |
| 56 | ESR2 | 0 | 0.040514776 | 2 | 0.068541139 | 1 | 2 |
| 57 | HSP90AB1 | 0 | 0.040437678 | 2 | 0.056306358 | 1 | 2 |
| 58 | NFATC1 | 124 | 0.040341718 | 2 | 0.030105675 | 0 | 0 |
| 59 | SERPINE1 | 2 | 0.011904762 | 2 | 0 | 0 | 0 |
| 60 | PTGES | 124 | 0.039849977 | 2 | 0.012510073 | 0 | 0 |
| 61 | ACHE | 0 | 0.011903095 | 1 | 0 | 0 | 0 |
| 62 | ADIPOQ | 0 | 0.039152464 | 1 | 0.004477769 | 0 | 0 |
| 63 | HSPB1 | 0 | 0.040265277 | 1 | 0.03551425 | 0 | 0 |
| 64 | BACE1 | 0 | 0.011903095 | 1 | 0 | 0 | 0 |
| 65 | SOD1 | 0 | 0.012043072 | 1 | 0 | 0 | 0 |
| 66 | CD40LG | 0 | 0.039406583 | 1 | 0.009945426 | 0 | 0 |
| 67 | SELE | 0 | 0.039887377 | 1 | 0.008687723 | 0 | 0 |
| 68 | MMP2 | 0 | 0.011903095 | 1 | 0 | 0 | 0 |
| 69 | COL3A1 | 0 | 0.011903095 | 1 | 0 | 0 | 0 |
| 70 | CXCL11 | 0 | 0.039188566 | 1 | 0.006897212 | 0 | 0 |
| 71 | SULT1E1 | 0 | 0.039044557 | 1 | 0.006025582 | 0 | 0 |
| 72 | DPP4 | 0 | 0.038937242 | 1 | 0.002115443 | 0 | 0 |
| 73 | F3 | 0 | 0.011764706 | 1 | 0 | 0 | 0 |
| 74 | F7 | 0 | 0.011764706 | 1 | 0 | 0 | 0 |
| 75 | GOT1 | 0 | 0.011764706 | 1 | 0 | 0 | 0 |
| 76 | TYR | 0 | 0.011764706 | 1 | 0 | 0 | 0 |
| 77 | NFE2L2 | 0 | 0.012043072 | 1 | 0 | 0 | 0 |
| 78 | IGF2 | 0 | 0.011764706 | 1 | 0 | 0 | 0 |
| 79 | IGFBP3 | 0 | 0.011764706 | 1 | 0 | 0 | 0 |
| 80 | MMP1 | 0 | 0.038919414 | 1 | 0.001864039 | 0 | 0 |
| 81 | NCF1 | 0 | 0.039279113 | 1 | 0.005486221 | 0 | 0 |
| 82 | PPP3CA | 0 | 0.039188566 | 1 | 0.00453352 | 0 | 0 |
| 83 | NOS2 | 0 | 0.040265277 | 1 | 0.029203398 | 0 | 0 |
| 84 | PLAT | 0 | 0.011903095 | 1 | 0 | 0 | 0 |
| 85 | PLAU | 0 | 0.011903095 | 1 | 0 | 0 | 0 |
| 86 | PTGS1 | 0 | 0.038724374 | 1 | 0.001876703 | 0 | 0 |

**Supplementary Table 7.** Nine hundred and sixty-five biological processes, cellular components, and molecular functions were enriched based on GO analysis

| Category | GO | Description |
| --- | --- | --- |
| GO Molecular Functions | GO:0005126 | cytokine receptor binding |
| GO Molecular Functions | GO:0005125 | cytokine activity |
| GO Molecular Functions | GO:0005102 | signaling receptor binding |
| GO Molecular Functions | GO:0046983 | protein dimerization activity |
| GO Molecular Functions | GO:0042802 | identical protein binding |
| GO Molecular Functions | GO:0019899 | enzyme binding |
| GO Molecular Functions | GO:0004175 | endopeptidase activity |
| GO Molecular Functions | GO:0008233 | peptidase activity |
| GO Molecular Functions | GO:0042803 | protein homodimerization activity |
| GO Molecular Functions | GO:0004712 | protein serine/threonine/tyrosine kinase activity |
| GO Molecular Functions | GO:0048018 | receptor ligand activity |
| GO Molecular Functions | GO:0030546 | signaling receptor activator activity |
| GO Molecular Functions | GO:0030545 | signaling receptor regulator activity |
| GO Molecular Functions | GO:0070851 | growth factor receptor binding |
| GO Molecular Functions | GO:0042379 | chemokine receptor binding |
| GO Molecular Functions | GO:0004601 | peroxidase activity |
| GO Molecular Functions | GO:0008237 | metallopeptidase activity |
| GO Molecular Functions | GO:0020037 | heme binding |
| GO Molecular Functions | GO:0004672 | protein kinase activity |
| GO Molecular Functions | GO:0002020 | protease binding |
| GO Molecular Functions | GO:0046982 | protein heterodimerization activity |
| GO Molecular Functions | GO:0001540 | amyloid-beta binding |
| GO Molecular Functions | GO:0004222 | metalloendopeptidase activity |
| GO Molecular Functions | GO:0106310 | protein serine kinase activity |
| GO Molecular Functions | GO:0038023 | signaling receptor activity |
| GO Molecular Functions | GO:0060089 | molecular transducer activity |
| GO Molecular Functions | GO:0015108 | chloride transmembrane transporter activity |
| GO Molecular Functions | GO:0016684 | oxidoreductase activity, acting on peroxide as acceptor |
| GO Molecular Functions | GO:0050661 | NADP binding |
| GO Molecular Functions | GO:0016209 | antioxidant activity |
| GO Molecular Functions | GO:0046906 | tetrapyrrole binding |
| GO Molecular Functions | GO:0098772 | molecular function regulator activity |
| GO Molecular Functions | GO:0004674 | protein serine/threonine kinase activity |
| GO Molecular Functions | GO:0015459 | potassium channel regulator activity |
| GO Molecular Functions | GO:0016773 | phosphotransferase activity, alcohol group as acceptor |
| GO Molecular Functions | GO:0008270 | zinc ion binding |
| GO Molecular Functions | GO:1901682 | sulfur compound transmembrane transporter activity |
| GO Molecular Functions | GO:0004888 | transmembrane signaling receptor activity |
| GO Molecular Functions | GO:0001221 | transcription coregulator binding |
| GO Molecular Functions | GO:0015370 | solute:sodium symporter activity |
| GO Molecular Functions | GO:0042626 | ATPase-coupled transmembrane transporter activity |
| GO Molecular Functions | GO:0046914 | transition metal ion binding |
| GO Molecular Functions | GO:0004252 | serine-type endopeptidase activity |
| GO Molecular Functions | GO:0008509 | anion transmembrane transporter activity |
| GO Molecular Functions | GO:1990782 | protein tyrosine kinase binding |
| GO Molecular Functions | GO:0000976 | transcription cis-regulatory region binding |
| GO Molecular Functions | GO:0001067 | transcription regulatory region nucleic acid binding |
| GO Molecular Functions | GO:0043565 | sequence-specific DNA binding |
| GO Molecular Functions | GO:0000978 | RNA polymerase II cis-regulatory region sequence-specific DNA binding |
| GO Molecular Functions | GO:0003690 | double-stranded DNA binding |
| GO Molecular Functions | GO:0004497 | monooxygenase activity |
| GO Molecular Functions | GO:0016301 | kinase activity |
| GO Molecular Functions | GO:0008236 | serine-type peptidase activity |
| GO Molecular Functions | GO:0016705 | oxidoreductase activity, acting on paired donors, with incorporation or reduction of molecular oxygen |
| GO Molecular Functions | GO:0015103 | inorganic anion transmembrane transporter activity |
| GO Molecular Functions | GO:0017171 | serine hydrolase activity |
| GO Molecular Functions | GO:0015294 | solute:cation symporter activity |
| GO Molecular Functions | GO:1990837 | sequence-specific double-stranded DNA binding |
| GO Molecular Functions | GO:0003700 | DNA-binding transcription factor activity |
| GO Molecular Functions | GO:0008201 | heparin binding |
| GO Molecular Functions | GO:0042277 | peptide binding |
| GO Molecular Functions | GO:0030594 | neurotransmitter receptor activity |
| GO Molecular Functions | GO:0000987 | cis-regulatory region sequence-specific DNA binding |
| GO Molecular Functions | GO:0000977 | RNA polymerase II transcription regulatory region sequence-specific DNA binding |
| GO Molecular Functions | GO:0005496 | steroid binding |
| GO Molecular Functions | GO:0072341 | modified amino acid binding |
| GO Cellular Components | GO:0005615 | extracellular space |
| GO Cellular Components | GO:0045121 | membrane raft |
| GO Cellular Components | GO:0098857 | membrane microdomain |
| GO Cellular Components | GO:0000307 | cyclin-dependent protein kinase holoenzyme complex |
| GO Cellular Components | GO:0098590 | plasma membrane region |
| GO Cellular Components | GO:0009986 | cell surface |
| GO Cellular Components | GO:0005901 | caveola |
| GO Cellular Components | GO:0044853 | plasma membrane raft |
| GO Cellular Components | GO:1902554 | serine/threonine protein kinase complex |
| GO Cellular Components | GO:1902911 | protein kinase complex |
| GO Cellular Components | GO:0045177 | apical part of cell |
| GO Cellular Components | GO:0016324 | apical plasma membrane |
| GO Cellular Components | GO:0017053 | transcription repressor complex |
| GO Biological Processes | GO:0048584 | positive regulation of response to stimulus |
| GO Biological Processes | GO:0071310 | cellular response to organic substance |
| GO Biological Processes | GO:1901701 | cellular response to oxygen-containing compound |
| GO Biological Processes | GO:1901700 | response to oxygen-containing compound |
| GO Biological Processes | GO:0042981 | regulation of apoptotic process |
| GO Biological Processes | GO:0006915 | apoptotic process |
| GO Biological Processes | GO:0043067 | regulation of programmed cell death |
| GO Biological Processes | GO:0012501 | programmed cell death |
| GO Biological Processes | GO:0042127 | regulation of cell population proliferation |
| GO Biological Processes | GO:0051240 | positive regulation of multicellular organismal process |
| GO Biological Processes | GO:0050793 | regulation of developmental process |
| GO Biological Processes | GO:0010941 | regulation of cell death |
| GO Biological Processes | GO:0009719 | response to endogenous stimulus |
| GO Biological Processes | GO:0010628 | positive regulation of gene expression |
| GO Biological Processes | GO:0008219 | cell death |
| GO Biological Processes | GO:0040012 | regulation of locomotion |
| GO Biological Processes | GO:0008283 | cell population proliferation |
| GO Biological Processes | GO:0030334 | regulation of cell migration |
| GO Biological Processes | GO:0043085 | positive regulation of catalytic activity |
| GO Biological Processes | GO:1901698 | response to nitrogen compound |
| GO Biological Processes | GO:0048878 | chemical homeostasis |
| GO Biological Processes | GO:0006468 | protein phosphorylation |
| GO Biological Processes | GO:2000026 | regulation of multicellular organismal development |
| GO Biological Processes | GO:2000145 | regulation of cell motility |
| GO Biological Processes | GO:0032101 | regulation of response to external stimulus |
| GO Biological Processes | GO:0044093 | positive regulation of molecular function |
| GO Biological Processes | GO:1901652 | response to peptide |
| GO Biological Processes | GO:0042592 | homeostatic process |
| GO Biological Processes | GO:0051270 | regulation of cellular component movement |
| GO Biological Processes | GO:0043066 | negative regulation of apoptotic process |
| GO Biological Processes | GO:1901699 | cellular response to nitrogen compound |
| GO Biological Processes | GO:0010647 | positive regulation of cell communication |
| GO Biological Processes | GO:0043069 | negative regulation of programmed cell death |
| GO Biological Processes | GO:0016310 | phosphorylation |
| GO Biological Processes | GO:0023056 | positive regulation of signaling |
| GO Biological Processes | GO:0010243 | response to organonitrogen compound |
| GO Biological Processes | GO:0016477 | cell migration |
| GO Biological Processes | GO:0050878 | regulation of body fluid levels |
| GO Biological Processes | GO:0006954 | inflammatory response |
| GO Biological Processes | GO:0040017 | positive regulation of locomotion |
| GO Biological Processes | GO:0046903 | secretion |
| GO Biological Processes | GO:0007267 | cell-cell signaling |
| GO Biological Processes | GO:0006809 | nitric oxide biosynthetic process |
| GO Biological Processes | GO:0001819 | positive regulation of cytokine production |
| GO Biological Processes | GO:0023061 | signal release |
| GO Biological Processes | GO:0060548 | negative regulation of cell death |
| GO Biological Processes | GO:0071495 | cellular response to endogenous stimulus |
| GO Biological Processes | GO:0009967 | positive regulation of signal transduction |
| GO Biological Processes | GO:0001934 | positive regulation of protein phosphorylation |
| GO Biological Processes | GO:0019220 | regulation of phosphate metabolic process |
| GO Biological Processes | GO:0051174 | regulation of phosphorus metabolic process |
| GO Biological Processes | GO:0051247 | positive regulation of protein metabolic process |
| GO Biological Processes | GO:0008284 | positive regulation of cell population proliferation |
| GO Biological Processes | GO:1903530 | regulation of secretion by cell |
| GO Biological Processes | GO:0051046 | regulation of secretion |
| GO Biological Processes | GO:0001816 | cytokine production |
| GO Biological Processes | GO:0046209 | nitric oxide metabolic process |
| GO Biological Processes | GO:0140352 | export from cell |
| GO Biological Processes | GO:0009306 | protein secretion |
| GO Biological Processes | GO:0010562 | positive regulation of phosphorus metabolic process |
| GO Biological Processes | GO:0045937 | positive regulation of phosphate metabolic process |
| GO Biological Processes | GO:0035592 | establishment of protein localization to extracellular region |
| GO Biological Processes | GO:0035556 | intracellular signal transduction |
| GO Biological Processes | GO:0071692 | protein localization to extracellular region |
| GO Biological Processes | GO:0042327 | positive regulation of phosphorylation |
| GO Biological Processes | GO:2001057 | reactive nitrogen species metabolic process |
| GO Biological Processes | GO:0042325 | regulation of phosphorylation |
| GO Biological Processes | GO:0042886 | amide transport |
| GO Biological Processes | GO:0003008 | system process |
| GO Biological Processes | GO:0050708 | regulation of protein secretion |
| GO Biological Processes | GO:0034097 | response to cytokine |
| GO Biological Processes | GO:0071417 | cellular response to organonitrogen compound |
| GO Biological Processes | GO:0048870 | cell motility |
| GO Biological Processes | GO:0051674 | localization of cell |
| GO Biological Processes | GO:0009653 | anatomical structure morphogenesis |
| GO Biological Processes | GO:0030155 | regulation of cell adhesion |
| GO Biological Processes | GO:0000165 | MAPK cascade |
| GO Biological Processes | GO:0071345 | cellular response to cytokine stimulus |
| GO Biological Processes | GO:0030335 | positive regulation of cell migration |
| GO Biological Processes | GO:0032940 | secretion by cell |
| GO Biological Processes | GO:0051049 | regulation of transport |
| GO Biological Processes | GO:0001932 | regulation of protein phosphorylation |
| GO Biological Processes | GO:0001817 | regulation of cytokine production |
| GO Biological Processes | GO:0009628 | response to abiotic stimulus |
| GO Biological Processes | GO:0032270 | positive regulation of cellular protein metabolic process |
| GO Biological Processes | GO:0099536 | synaptic signaling |
| GO Biological Processes | GO:0045595 | regulation of cell differentiation |
| GO Biological Processes | GO:0031401 | positive regulation of protein modification process |
| GO Biological Processes | GO:0040011 | locomotion |
| GO Biological Processes | GO:2000147 | positive regulation of cell motility |
| GO Biological Processes | GO:1902533 | positive regulation of intracellular signal transduction |
| GO Biological Processes | GO:0009891 | positive regulation of biosynthetic process |
| GO Biological Processes | GO:0050790 | regulation of catalytic activity |
| GO Biological Processes | GO:0001775 | cell activation |
| GO Biological Processes | GO:0051272 | positive regulation of cellular component movement |
| GO Biological Processes | GO:0051241 | negative regulation of multicellular organismal process |
| GO Biological Processes | GO:0050920 | regulation of chemotaxis |
| GO Biological Processes | GO:0080134 | regulation of response to stress |
| GO Biological Processes | GO:0022407 | regulation of cell-cell adhesion |
| GO Biological Processes | GO:0033500 | carbohydrate homeostasis |
| GO Biological Processes | GO:0042593 | glucose homeostasis |
| GO Biological Processes | GO:0055082 | cellular chemical homeostasis |
| GO Biological Processes | GO:0031328 | positive regulation of cellular biosynthetic process |
| GO Biological Processes | GO:0032268 | regulation of cellular protein metabolic process |
| GO Biological Processes | GO:0048585 | negative regulation of response to stimulus |
| GO Biological Processes | GO:0001659 | temperature homeostasis |
| GO Biological Processes | GO:0019725 | cellular homeostasis |
| GO Biological Processes | GO:0006928 | movement of cell or subcellular component |
| GO Biological Processes | GO:0009725 | response to hormone |
| GO Biological Processes | GO:0032103 | positive regulation of response to external stimulus |
| GO Biological Processes | GO:0010573 | vascular endothelial growth factor production |
| GO Biological Processes | GO:1901653 | cellular response to peptide |
| GO Biological Processes | GO:0042060 | wound healing |
| GO Biological Processes | GO:0050673 | epithelial cell proliferation |
| GO Biological Processes | GO:0006357 | regulation of transcription by RNA polymerase II |
| GO Biological Processes | GO:0015833 | peptide transport |
| GO Biological Processes | GO:0009611 | response to wounding |
| GO Biological Processes | GO:0009890 | negative regulation of biosynthetic process |
| GO Biological Processes | GO:0031399 | regulation of protein modification process |
| GO Biological Processes | GO:0044057 | regulation of system process |
| GO Biological Processes | GO:1902531 | regulation of intracellular signal transduction |
| GO Biological Processes | GO:0071887 | leukocyte apoptotic process |
| GO Biological Processes | GO:0043434 | response to peptide hormone |
| GO Biological Processes | GO:0060326 | cell chemotaxis |
| GO Biological Processes | GO:0070661 | leukocyte proliferation |
| GO Biological Processes | GO:1903037 | regulation of leukocyte cell-cell adhesion |
| GO Biological Processes | GO:0003013 | circulatory system process |
| GO Biological Processes | GO:0043065 | positive regulation of apoptotic process |
| GO Biological Processes | GO:0051093 | negative regulation of developmental process |
| GO Biological Processes | GO:0045935 | positive regulation of nucleobase-containing compound metabolic process |
| GO Biological Processes | GO:0043068 | positive regulation of programmed cell death |
| GO Biological Processes | GO:0002682 | regulation of immune system process |
| GO Biological Processes | GO:0007186 | G protein-coupled receptor signaling pathway |
| GO Biological Processes | GO:0051094 | positive regulation of developmental process |
| GO Biological Processes | GO:0045428 | regulation of nitric oxide biosynthetic process |
| GO Biological Processes | GO:0050921 | positive regulation of chemotaxis |
| GO Biological Processes | GO:0071902 | positive regulation of protein serine/threonine kinase activity |
| GO Biological Processes | GO:0043408 | regulation of MAPK cascade |
| GO Biological Processes | GO:0071214 | cellular response to abiotic stimulus |
| GO Biological Processes | GO:0104004 | cellular response to environmental stimulus |
| GO Biological Processes | GO:0007167 | enzyme linked receptor protein signaling pathway |
| GO Biological Processes | GO:0071900 | regulation of protein serine/threonine kinase activity |
| GO Biological Processes | GO:0090087 | regulation of peptide transport |
| GO Biological Processes | GO:0099537 | trans-synaptic signaling |
| GO Biological Processes | GO:0045893 | positive regulation of transcription, DNA-templated |
| GO Biological Processes | GO:1903508 | positive regulation of nucleic acid-templated transcription |
| GO Biological Processes | GO:0007596 | blood coagulation |
| GO Biological Processes | GO:0007599 | hemostasis |
| GO Biological Processes | GO:1901214 | regulation of neuron death |
| GO Biological Processes | GO:0023057 | negative regulation of signaling |
| GO Biological Processes | GO:0018209 | peptidyl-serine modification |
| GO Biological Processes | GO:0050817 | coagulation |
| GO Biological Processes | GO:1902680 | positive regulation of RNA biosynthetic process |
| GO Biological Processes | GO:0045892 | negative regulation of transcription, DNA-templated |
| GO Biological Processes | GO:0006952 | defense response |
| GO Biological Processes | GO:1902679 | negative regulation of RNA biosynthetic process |
| GO Biological Processes | GO:1903507 | negative regulation of nucleic acid-templated transcription |
| GO Biological Processes | GO:0032943 | mononuclear cell proliferation |
| GO Biological Processes | GO:0046651 | lymphocyte proliferation |
| GO Biological Processes | GO:0062012 | regulation of small molecule metabolic process |
| GO Biological Processes | GO:0006690 | icosanoid metabolic process |
| GO Biological Processes | GO:0071356 | cellular response to tumor necrosis factor |
| GO Biological Processes | GO:0045931 | positive regulation of mitotic cell cycle |
| GO Biological Processes | GO:0006366 | transcription by RNA polymerase II |
| GO Biological Processes | GO:0010942 | positive regulation of cell death |
| GO Biological Processes | GO:0007159 | leukocyte cell-cell adhesion |
| GO Biological Processes | GO:0048514 | blood vessel morphogenesis |
| GO Biological Processes | GO:0098609 | cell-cell adhesion |
| GO Biological Processes | GO:0051253 | negative regulation of RNA metabolic process |
| GO Biological Processes | GO:0051128 | regulation of cellular component organization |
| GO Biological Processes | GO:0045944 | positive regulation of transcription by RNA polymerase II |
| GO Biological Processes | GO:0001568 | blood vessel development |
| GO Biological Processes | GO:0006508 | proteolysis |
| GO Biological Processes | GO:0007169 | transmembrane receptor protein tyrosine kinase signaling pathway |
| GO Biological Processes | GO:0051345 | positive regulation of hydrolase activity |
| GO Biological Processes | GO:0080164 | regulation of nitric oxide metabolic process |
| GO Biological Processes | GO:0007188 | adenylate cyclase-modulating G protein-coupled receptor signaling pathway |
| GO Biological Processes | GO:0010557 | positive regulation of macromolecule biosynthetic process |
| GO Biological Processes | GO:0007166 | cell surface receptor signaling pathway |
| GO Biological Processes | GO:0051172 | negative regulation of nitrogen compound metabolic process |
| GO Biological Processes | GO:0044839 | cell cycle G2/M phase transition |
| GO Biological Processes | GO:0010817 | regulation of hormone levels |
| GO Biological Processes | GO:0031324 | negative regulation of cellular metabolic process |
| GO Biological Processes | GO:0031327 | negative regulation of cellular biosynthetic process |
| GO Biological Processes | GO:0006953 | acute-phase response |
| GO Biological Processes | GO:0046879 | hormone secretion |
| GO Biological Processes | GO:0051052 | regulation of DNA metabolic process |
| GO Biological Processes | GO:0001944 | vasculature development |
| GO Biological Processes | GO:0034612 | response to tumor necrosis factor |
| GO Biological Processes | GO:0046883 | regulation of hormone secretion |
| GO Biological Processes | GO:0070997 | neuron death |
| GO Biological Processes | GO:0018105 | peptidyl-serine phosphorylation |
| GO Biological Processes | GO:0030595 | leukocyte chemotaxis |
| GO Biological Processes | GO:0097190 | apoptotic signaling pathway |
| GO Biological Processes | GO:0050727 | regulation of inflammatory response |
| GO Biological Processes | GO:0042110 | T cell activation |
| GO Biological Processes | GO:0010648 | negative regulation of cell communication |
| GO Biological Processes | GO:0045934 | negative regulation of nucleobase-containing compound metabolic process |
| GO Biological Processes | GO:0030162 | regulation of proteolysis |
| GO Biological Processes | GO:0070663 | regulation of leukocyte proliferation |
| GO Biological Processes | GO:1903039 | positive regulation of leukocyte cell-cell adhesion |
| GO Biological Processes | GO:0045787 | positive regulation of cell cycle |
| GO Biological Processes | GO:0042100 | B cell proliferation |
| GO Biological Processes | GO:0048871 | multicellular organismal homeostasis |
| GO Biological Processes | GO:0009914 | hormone transport |
| GO Biological Processes | GO:0099177 | regulation of trans-synaptic signaling |
| GO Biological Processes | GO:0002526 | acute inflammatory response |
| GO Biological Processes | GO:0030879 | mammary gland development |
| GO Biological Processes | GO:0006355 | regulation of transcription, DNA-templated |
| GO Biological Processes | GO:0051254 | positive regulation of RNA metabolic process |
| GO Biological Processes | GO:0050900 | leukocyte migration |
| GO Biological Processes | GO:0051051 | negative regulation of transport |
| GO Biological Processes | GO:1903506 | regulation of nucleic acid-templated transcription |
| GO Biological Processes | GO:0035239 | tube morphogenesis |
| GO Biological Processes | GO:0006935 | chemotaxis |
| GO Biological Processes | GO:0006979 | response to oxidative stress |
| GO Biological Processes | GO:0051338 | regulation of transferase activity |
| GO Biological Processes | GO:0007268 | chemical synaptic transmission |
| GO Biological Processes | GO:0098916 | anterograde trans-synaptic signaling |
| GO Biological Processes | GO:2001141 | regulation of RNA biosynthetic process |
| GO Biological Processes | GO:0030003 | cellular cation homeostasis |
| GO Biological Processes | GO:0042330 | taxis |
| GO Biological Processes | GO:0009887 | animal organ morphogenesis |
| GO Biological Processes | GO:0051223 | regulation of protein transport |
| GO Biological Processes | GO:0043523 | regulation of neuron apoptotic process |
| GO Biological Processes | GO:0045785 | positive regulation of cell adhesion |
| GO Biological Processes | GO:0071705 | nitrogen compound transport |
| GO Biological Processes | GO:0090257 | regulation of muscle system process |
| GO Biological Processes | GO:0045596 | negative regulation of cell differentiation |
| GO Biological Processes | GO:0034644 | cellular response to UV |
| GO Biological Processes | GO:0045766 | positive regulation of angiogenesis |
| GO Biological Processes | GO:0090276 | regulation of peptide hormone secretion |
| GO Biological Processes | GO:1904018 | positive regulation of vasculature development |
| GO Biological Processes | GO:0006873 | cellular ion homeostasis |
| GO Biological Processes | GO:0001836 | release of cytochrome c from mitochondria |
| GO Biological Processes | GO:0008015 | blood circulation |
| GO Biological Processes | GO:0050865 | regulation of cell activation |
| GO Biological Processes | GO:0031279 | regulation of cyclase activity |
| GO Biological Processes | GO:0002791 | regulation of peptide secretion |
| GO Biological Processes | GO:0022409 | positive regulation of cell-cell adhesion |
| GO Biological Processes | GO:0062197 | cellular response to chemical stress |
| GO Biological Processes | GO:0045321 | leukocyte activation |
| GO Biological Processes | GO:0045859 | regulation of protein kinase activity |
| GO Biological Processes | GO:0000278 | mitotic cell cycle |
| GO Biological Processes | GO:0006940 | regulation of smooth muscle contraction |
| GO Biological Processes | GO:0008285 | negative regulation of cell population proliferation |
| GO Biological Processes | GO:0030072 | peptide hormone secretion |
| GO Biological Processes | GO:0050731 | positive regulation of peptidyl-tyrosine phosphorylation |
| GO Biological Processes | GO:0051048 | negative regulation of secretion |
| GO Biological Processes | GO:0009894 | regulation of catabolic process |
| GO Biological Processes | GO:0046649 | lymphocyte activation |
| GO Biological Processes | GO:0002790 | peptide secretion |
| GO Biological Processes | GO:0042098 | T cell proliferation |
| GO Biological Processes | GO:0043270 | positive regulation of ion transport |
| GO Biological Processes | GO:0050870 | positive regulation of T cell activation |
| GO Biological Processes | GO:0071478 | cellular response to radiation |
| GO Biological Processes | GO:0018108 | peptidyl-tyrosine phosphorylation |
| GO Biological Processes | GO:0070201 | regulation of establishment of protein localization |
| GO Biological Processes | GO:0010524 | positive regulation of calcium ion transport into cytosol |
| GO Biological Processes | GO:0051349 | positive regulation of lyase activity |
| GO Biological Processes | GO:0002694 | regulation of leukocyte activation |
| GO Biological Processes | GO:0007346 | regulation of mitotic cell cycle |
| GO Biological Processes | GO:0071482 | cellular response to light stimulus |
| GO Biological Processes | GO:0035295 | tube development |
| GO Biological Processes | GO:0018212 | peptidyl-tyrosine modification |
| GO Biological Processes | GO:0009411 | response to UV |
| GO Biological Processes | GO:0000122 | negative regulation of transcription by RNA polymerase II |
| GO Biological Processes | GO:0010558 | negative regulation of macromolecule biosynthetic process |
| GO Biological Processes | GO:0032944 | regulation of mononuclear cell proliferation |
| GO Biological Processes | GO:0042113 | B cell activation |
| GO Biological Processes | GO:0050670 | regulation of lymphocyte proliferation |
| GO Biological Processes | GO:0051402 | neuron apoptotic process |
| GO Biological Processes | GO:0097529 | myeloid leukocyte migration |
| GO Biological Processes | GO:0000086 | G2/M transition of mitotic cell cycle |
| GO Biological Processes | GO:0048659 | smooth muscle cell proliferation |
| GO Biological Processes | GO:0048660 | regulation of smooth muscle cell proliferation |
| GO Biological Processes | GO:0050863 | regulation of T cell activation |
| GO Biological Processes | GO:0042509 | regulation of tyrosine phosphorylation of STAT protein |
| GO Biological Processes | GO:0051339 | regulation of lyase activity |
| GO Biological Processes | GO:0070227 | lymphocyte apoptotic process |
| GO Biological Processes | GO:1901992 | positive regulation of mitotic cell cycle phase transition |
| GO Biological Processes | GO:0030198 | extracellular matrix organization |
| GO Biological Processes | GO:0043281 | regulation of cysteine-type endopeptidase activity involved in apoptotic process |
| GO Biological Processes | GO:0045229 | external encapsulating structure organization |
| GO Biological Processes | GO:0072359 | circulatory system development |
| GO Biological Processes | GO:0030073 | insulin secretion |
| GO Biological Processes | GO:0034764 | positive regulation of transmembrane transport |
| GO Biological Processes | GO:0042176 | regulation of protein catabolic process |
| GO Biological Processes | GO:0043410 | positive regulation of MAPK cascade |
| GO Biological Processes | GO:0051336 | regulation of hydrolase activity |
| GO Biological Processes | GO:0007155 | cell adhesion |
| GO Biological Processes | GO:0051928 | positive regulation of calcium ion transport |
| GO Biological Processes | GO:0071466 | cellular response to xenobiotic stimulus |
| GO Biological Processes | GO:2000278 | regulation of DNA biosynthetic process |
| GO Biological Processes | GO:0043062 | extracellular structure organization |
| GO Biological Processes | GO:0050730 | regulation of peptidyl-tyrosine phosphorylation |
| GO Biological Processes | GO:0034762 | regulation of transmembrane transport |
| GO Biological Processes | GO:0051249 | regulation of lymphocyte activation |
| GO Biological Processes | GO:0010634 | positive regulation of epithelial cell migration |
| GO Biological Processes | GO:0051726 | regulation of cell cycle |
| GO Biological Processes | GO:0070848 | response to growth factor |
| GO Biological Processes | GO:0022603 | regulation of anatomical structure morphogenesis |
| GO Biological Processes | GO:0009416 | response to light stimulus |
| GO Biological Processes | GO:0071375 | cellular response to peptide hormone stimulus |
| GO Biological Processes | GO:0050678 | regulation of epithelial cell proliferation |
| GO Biological Processes | GO:1903047 | mitotic cell cycle process |
| GO Biological Processes | GO:0010605 | negative regulation of macromolecule metabolic process |
| GO Biological Processes | GO:0007200 | phospholipase C-activating G protein-coupled receptor signaling pathway |
| GO Biological Processes | GO:0007260 | tyrosine phosphorylation of STAT protein |
| GO Biological Processes | GO:0030888 | regulation of B cell proliferation |
| GO Biological Processes | GO:0050796 | regulation of insulin secretion |
| GO Biological Processes | GO:1903844 | regulation of cellular response to transforming growth factor beta stimulus |
| GO Biological Processes | GO:0003018 | vascular process in circulatory system |
| GO Biological Processes | GO:0050804 | modulation of chemical synaptic transmission |
| GO Biological Processes | GO:0051301 | cell division |
| GO Biological Processes | GO:0019221 | cytokine-mediated signaling pathway |
| GO Biological Processes | GO:2001233 | regulation of apoptotic signaling pathway |
| GO Biological Processes | GO:0055080 | cation homeostasis |
| GO Biological Processes | GO:0002688 | regulation of leukocyte chemotaxis |
| GO Biological Processes | GO:0006692 | prostanoid metabolic process |
| GO Biological Processes | GO:0006693 | prostaglandin metabolic process |
| GO Biological Processes | GO:0007189 | adenylate cyclase-activating G protein-coupled receptor signaling pathway |
| GO Biological Processes | GO:0030168 | platelet activation |
| GO Biological Processes | GO:0044772 | mitotic cell cycle phase transition |
| GO Biological Processes | GO:0007595 | lactation |
| GO Biological Processes | GO:0032757 | positive regulation of interleukin-8 production |
| GO Biological Processes | GO:0048708 | astrocyte differentiation |
| GO Biological Processes | GO:0090199 | regulation of release of cytochrome c from mitochondria |
| GO Biological Processes | GO:0120162 | positive regulation of cold-induced thermogenesis |
| GO Biological Processes | GO:0032870 | cellular response to hormone stimulus |
| GO Biological Processes | GO:0051347 | positive regulation of transferase activity |
| GO Biological Processes | GO:0042063 | gliogenesis |
| GO Biological Processes | GO:0050679 | positive regulation of epithelial cell proliferation |
| GO Biological Processes | GO:0070665 | positive regulation of leukocyte proliferation |
| GO Biological Processes | GO:0098771 | inorganic ion homeostasis |
| GO Biological Processes | GO:0002683 | negative regulation of immune system process |
| GO Biological Processes | GO:0048732 | gland development |
| GO Biological Processes | GO:0002521 | leukocyte differentiation |
| GO Biological Processes | GO:0002761 | regulation of myeloid leukocyte differentiation |
| GO Biological Processes | GO:0007589 | body fluid secretion |
| GO Biological Processes | GO:0050864 | regulation of B cell activation |
| GO Biological Processes | GO:0010038 | response to metal ion |
| GO Biological Processes | GO:0009314 | response to radiation |
| GO Biological Processes | GO:0045862 | positive regulation of proteolysis |
| GO Biological Processes | GO:0019216 | regulation of lipid metabolic process |
| GO Biological Processes | GO:0045597 | positive regulation of cell differentiation |
| GO Biological Processes | GO:0009410 | response to xenobiotic stimulus |
| GO Biological Processes | GO:0043549 | regulation of kinase activity |
| GO Biological Processes | GO:0010035 | response to inorganic substance |
| GO Biological Processes | GO:0051091 | positive regulation of DNA-binding transcription factor activity |
| GO Biological Processes | GO:2000116 | regulation of cysteine-type endopeptidase activity |
| GO Biological Processes | GO:0032637 | interleukin-8 production |
| GO Biological Processes | GO:0032677 | regulation of interleukin-8 production |
| GO Biological Processes | GO:0046456 | icosanoid biosynthetic process |
| GO Biological Processes | GO:2000106 | regulation of leukocyte apoptotic process |
| GO Biological Processes | GO:0050801 | ion homeostasis |
| GO Biological Processes | GO:0001936 | regulation of endothelial cell proliferation |
| GO Biological Processes | GO:0051781 | positive regulation of cell division |
| GO Biological Processes | GO:1903531 | negative regulation of secretion by cell |
| GO Biological Processes | GO:0051050 | positive regulation of transport |
| GO Biological Processes | GO:0006937 | regulation of muscle contraction |
| GO Biological Processes | GO:0048771 | tissue remodeling |
| GO Biological Processes | GO:0043254 | regulation of protein-containing complex assembly |
| GO Biological Processes | GO:0009968 | negative regulation of signal transduction |
| GO Biological Processes | GO:0048646 | anatomical structure formation involved in morphogenesis |
| GO Biological Processes | GO:0051129 | negative regulation of cellular component organization |
| GO Biological Processes | GO:0051130 | positive regulation of cellular component organization |
| GO Biological Processes | GO:0031347 | regulation of defense response |
| GO Biological Processes | GO:1902105 | regulation of leukocyte differentiation |
| GO Biological Processes | GO:0006939 | smooth muscle contraction |
| GO Biological Processes | GO:0006811 | ion transport |
| GO Biological Processes | GO:1902749 | regulation of cell cycle G2/M phase transition |
| GO Biological Processes | GO:0045860 | positive regulation of protein kinase activity |
| GO Biological Processes | GO:0045765 | regulation of angiogenesis |
| GO Biological Processes | GO:0051251 | positive regulation of lymphocyte activation |
| GO Biological Processes | GO:0002285 | lymphocyte activation involved in immune response |
| GO Biological Processes | GO:0032868 | response to insulin |
| GO Biological Processes | GO:0043269 | regulation of ion transport |
| GO Biological Processes | GO:0060429 | epithelium development |
| GO Biological Processes | GO:0050709 | negative regulation of protein secretion |
| GO Biological Processes | GO:1901989 | positive regulation of cell cycle phase transition |
| GO Biological Processes | GO:1901342 | regulation of vasculature development |
| GO Biological Processes | GO:1903706 | regulation of hemopoiesis |
| GO Biological Processes | GO:0050918 | positive chemotaxis |
| GO Biological Processes | GO:0051054 | positive regulation of DNA metabolic process |
| GO Biological Processes | GO:0090068 | positive regulation of cell cycle process |
| GO Biological Processes | GO:0034599 | cellular response to oxidative stress |
| GO Biological Processes | GO:0014070 | response to organic cyclic compound |
| GO Biological Processes | GO:0001938 | positive regulation of endothelial cell proliferation |
| GO Biological Processes | GO:0002532 | production of molecular mediator involved in inflammatory response |
| GO Biological Processes | GO:0022612 | gland morphogenesis |
| GO Biological Processes | GO:1901216 | positive regulation of neuron death |
| GO Biological Processes | GO:0019752 | carboxylic acid metabolic process |
| GO Biological Processes | GO:0007610 | behavior |
| GO Biological Processes | GO:0043436 | oxoacid metabolic process |
| GO Biological Processes | GO:0030855 | epithelial cell differentiation |
| GO Biological Processes | GO:0002685 | regulation of leukocyte migration |
| GO Biological Processes | GO:0045637 | regulation of myeloid cell differentiation |
| GO Biological Processes | GO:2001242 | regulation of intrinsic apoptotic signaling pathway |
| GO Biological Processes | GO:0002696 | positive regulation of leukocyte activation |
| GO Biological Processes | GO:0010876 | lipid localization |
| GO Biological Processes | GO:0033002 | muscle cell proliferation |
| GO Biological Processes | GO:0071453 | cellular response to oxygen levels |
| GO Biological Processes | GO:0032880 | regulation of protein localization |
| GO Biological Processes | GO:0001666 | response to hypoxia |
| GO Biological Processes | GO:1901990 | regulation of mitotic cell cycle phase transition |
| GO Biological Processes | GO:0019233 | sensory perception of pain |
| GO Biological Processes | GO:0032091 | negative regulation of protein binding |
| GO Biological Processes | GO:0006869 | lipid transport |
| GO Biological Processes | GO:0006875 | cellular metal ion homeostasis |
| GO Biological Processes | GO:0050867 | positive regulation of cell activation |
| GO Biological Processes | GO:0043405 | regulation of MAP kinase activity |
| GO Biological Processes | GO:0006082 | organic acid metabolic process |
| GO Biological Processes | GO:0036293 | response to decreased oxygen levels |
| GO Biological Processes | GO:0051480 | regulation of cytosolic calcium ion concentration |
| GO Biological Processes | GO:1903522 | regulation of blood circulation |
| GO Biological Processes | GO:0001525 | angiogenesis |
| GO Biological Processes | GO:0033554 | cellular response to stress |
| GO Biological Processes | GO:0060322 | head development |
| GO Biological Processes | GO:0050871 | positive regulation of B cell activation |
| GO Biological Processes | GO:1902106 | negative regulation of leukocyte differentiation |
| GO Biological Processes | GO:0001505 | regulation of neurotransmitter levels |
| GO Biological Processes | GO:0033559 | unsaturated fatty acid metabolic process |
| GO Biological Processes | GO:0051224 | negative regulation of protein transport |
| GO Biological Processes | GO:0048545 | response to steroid hormone |
| GO Biological Processes | GO:0007049 | cell cycle |
| GO Biological Processes | GO:0033674 | positive regulation of kinase activity |
| GO Biological Processes | GO:0010332 | response to gamma radiation |
| GO Biological Processes | GO:0030890 | positive regulation of B cell proliferation |
| GO Biological Processes | GO:0070228 | regulation of lymphocyte apoptotic process |
| GO Biological Processes | GO:2000134 | negative regulation of G1/S transition of mitotic cell cycle |
| GO Biological Processes | GO:0002684 | positive regulation of immune system process |
| GO Biological Processes | GO:0003012 | muscle system process |
| GO Biological Processes | GO:1904062 | regulation of cation transmembrane transport |
| GO Biological Processes | GO:0001935 | endothelial cell proliferation |
| GO Biological Processes | GO:0032946 | positive regulation of mononuclear cell proliferation |
| GO Biological Processes | GO:0044843 | cell cycle G1/S phase transition |
| GO Biological Processes | GO:0050671 | positive regulation of lymphocyte proliferation |
| GO Biological Processes | GO:1904950 | negative regulation of establishment of protein localization |
| GO Biological Processes | GO:0009888 | tissue development |
| GO Biological Processes | GO:0070555 | response to interleukin-1 |
| GO Biological Processes | GO:0071456 | cellular response to hypoxia |
| GO Biological Processes | GO:1903707 | negative regulation of hemopoiesis |
| GO Biological Processes | GO:0007249 | I-kappaB kinase/NF-kappaB signaling |
| GO Biological Processes | GO:0071216 | cellular response to biotic stimulus |
| GO Biological Processes | GO:1902532 | negative regulation of intracellular signal transduction |
| GO Biological Processes | GO:0048534 | hematopoietic or lymphoid organ development |
| GO Biological Processes | GO:0015031 | protein transport |
| GO Biological Processes | GO:0001503 | ossification |
| GO Biological Processes | GO:0001667 | ameboidal-type cell migration |
| GO Biological Processes | GO:0044770 | cell cycle phase transition |
| GO Biological Processes | GO:0010952 | positive regulation of peptidase activity |
| GO Biological Processes | GO:0042129 | regulation of T cell proliferation |
| GO Biological Processes | GO:0071674 | mononuclear cell migration |
| GO Biological Processes | GO:0006631 | fatty acid metabolic process |
| GO Biological Processes | GO:0031329 | regulation of cellular catabolic process |
| GO Biological Processes | GO:0006006 | glucose metabolic process |
| GO Biological Processes | GO:0030336 | negative regulation of cell migration |
| GO Biological Processes | GO:0010522 | regulation of calcium ion transport into cytosol |
| GO Biological Processes | GO:0017015 | regulation of transforming growth factor beta receptor signaling pathway |
| GO Biological Processes | GO:0030004 | cellular monovalent inorganic cation homeostasis |
| GO Biological Processes | GO:0033138 | positive regulation of peptidyl-serine phosphorylation |
| GO Biological Processes | GO:0036294 | cellular response to decreased oxygen levels |
| GO Biological Processes | GO:2001244 | positive regulation of intrinsic apoptotic signaling pathway |
| GO Biological Processes | GO:0052547 | regulation of peptidase activity |
| GO Biological Processes | GO:0033619 | membrane protein proteolysis |
| GO Biological Processes | GO:0035773 | insulin secretion involved in cellular response to glucose stimulus |
| GO Biological Processes | GO:0042743 | hydrogen peroxide metabolic process |
| GO Biological Processes | GO:0042987 | amyloid precursor protein catabolic process |
| GO Biological Processes | GO:0043525 | positive regulation of neuron apoptotic process |
| GO Biological Processes | GO:0046888 | negative regulation of hormone secretion |
| GO Biological Processes | GO:0050435 | amyloid-beta metabolic process |
| GO Biological Processes | GO:0150076 | neuroinflammatory response |
| GO Biological Processes | GO:2000300 | regulation of synaptic vesicle exocytosis |
| GO Biological Processes | GO:0008637 | apoptotic mitochondrial changes |
| GO Biological Processes | GO:0050729 | positive regulation of inflammatory response |
| GO Biological Processes | GO:0051302 | regulation of cell division |
| GO Biological Processes | GO:0033993 | response to lipid |
| GO Biological Processes | GO:0006629 | lipid metabolic process |
| GO Biological Processes | GO:0071363 | cellular response to growth factor stimulus |
| GO Biological Processes | GO:2000146 | negative regulation of cell motility |
| GO Biological Processes | GO:0002700 | regulation of production of molecular mediator of immune response |
| GO Biological Processes | GO:0015850 | organic hydroxy compound transport |
| GO Biological Processes | GO:0035150 | regulation of tube size |
| GO Biological Processes | GO:0035296 | regulation of tube diameter |
| GO Biological Processes | GO:0097191 | extrinsic apoptotic signaling pathway |
| GO Biological Processes | GO:0097746 | blood vessel diameter maintenance |
| GO Biological Processes | GO:0001678 | cellular glucose homeostasis |
| GO Biological Processes | GO:0002286 | T cell activation involved in immune response |
| GO Biological Processes | GO:0010595 | positive regulation of endothelial cell migration |
| GO Biological Processes | GO:0106106 | cold-induced thermogenesis |
| GO Biological Processes | GO:0120161 | regulation of cold-induced thermogenesis |
| GO Biological Processes | GO:1904064 | positive regulation of cation transmembrane transport |
| GO Biological Processes | GO:0010631 | epithelial cell migration |
| GO Biological Processes | GO:0090132 | epithelium migration |
| GO Biological Processes | GO:0051649 | establishment of localization in cell |
| GO Biological Processes | GO:0016485 | protein processing |
| GO Biological Processes | GO:0040013 | negative regulation of locomotion |
| GO Biological Processes | GO:0051271 | negative regulation of cellular component movement |
| GO Biological Processes | GO:0044262 | cellular carbohydrate metabolic process |
| GO Biological Processes | GO:0002520 | immune system development |
| GO Biological Processes | GO:0007162 | negative regulation of cell adhesion |
| GO Biological Processes | GO:0002534 | cytokine production involved in inflammatory response |
| GO Biological Processes | GO:0015844 | monoamine transport |
| GO Biological Processes | GO:0019229 | regulation of vasoconstriction |
| GO Biological Processes | GO:0042982 | amyloid precursor protein metabolic process |
| GO Biological Processes | GO:0043618 | regulation of transcription from RNA polymerase II promoter in response to stress |
| GO Biological Processes | GO:0048661 | positive regulation of smooth muscle cell proliferation |
| GO Biological Processes | GO:0051384 | response to glucocorticoid |
| GO Biological Processes | GO:0060147 | regulation of post-transcriptional gene silencing |
| GO Biological Processes | GO:0060964 | regulation of miRNA-mediated gene silencing |
| GO Biological Processes | GO:0070293 | renal absorption |
| GO Biological Processes | GO:1900015 | regulation of cytokine production involved in inflammatory response |
| GO Biological Processes | GO:1900368 | regulation of post-transcriptional gene silencing by RNA |
| GO Biological Processes | GO:1902807 | negative regulation of cell cycle G1/S phase transition |
| GO Biological Processes | GO:0032963 | collagen metabolic process |
| GO Biological Processes | GO:0071675 | regulation of mononuclear cell migration |
| GO Biological Processes | GO:2001257 | regulation of cation channel activity |
| GO Biological Processes | GO:0070482 | response to oxygen levels |
| GO Biological Processes | GO:0060284 | regulation of cell development |
| GO Biological Processes | GO:0055065 | metal ion homeostasis |
| GO Biological Processes | GO:0000302 | response to reactive oxygen species |
| GO Biological Processes | GO:0045732 | positive regulation of protein catabolic process |
| GO Biological Processes | GO:0022402 | cell cycle process |
| GO Biological Processes | GO:0009636 | response to toxic substance |
| GO Biological Processes | GO:0010632 | regulation of epithelial cell migration |
| GO Biological Processes | GO:0009896 | positive regulation of catabolic process |
| GO Biological Processes | GO:0007259 | receptor signaling pathway via JAK-STAT |
| GO Biological Processes | GO:0032635 | interleukin-6 production |
| GO Biological Processes | GO:0032675 | regulation of interleukin-6 production |
| GO Biological Processes | GO:0043154 | negative regulation of cysteine-type endopeptidase activity involved in apoptotic process |
| GO Biological Processes | GO:0043524 | negative regulation of neuron apoptotic process |
| GO Biological Processes | GO:0090130 | tissue migration |
| GO Biological Processes | GO:0031334 | positive regulation of protein-containing complex assembly |
| GO Biological Processes | GO:0045834 | positive regulation of lipid metabolic process |
| GO Biological Processes | GO:0050767 | regulation of neurogenesis |
| GO Biological Processes | GO:0071897 | DNA biosynthetic process |
| GO Biological Processes | GO:0051348 | negative regulation of transferase activity |
| GO Biological Processes | GO:0001516 | prostaglandin biosynthetic process |
| GO Biological Processes | GO:0001570 | vasculogenesis |
| GO Biological Processes | GO:0002762 | negative regulation of myeloid leukocyte differentiation |
| GO Biological Processes | GO:0035196 | production of miRNAs involved in gene silencing by miRNA |
| GO Biological Processes | GO:0043407 | negative regulation of MAP kinase activity |
| GO Biological Processes | GO:0043620 | regulation of DNA-templated transcription in response to stress |
| GO Biological Processes | GO:0046457 | prostanoid biosynthetic process |
| GO Biological Processes | GO:0050795 | regulation of behavior |
| GO Biological Processes | GO:0060966 | regulation of gene silencing by RNA |
| GO Biological Processes | GO:0097300 | programmed necrotic cell death |
| GO Biological Processes | GO:1903350 | response to dopamine |
| GO Biological Processes | GO:1903351 | cellular response to dopamine |
| GO Biological Processes | GO:1905330 | regulation of morphogenesis of an epithelium |
| GO Biological Processes | GO:1903131 | mononuclear cell differentiation |
| GO Biological Processes | GO:0018193 | peptidyl-amino acid modification |
| GO Biological Processes | GO:0010001 | glial cell differentiation |
| GO Biological Processes | GO:0009749 | response to glucose |
| GO Biological Processes | GO:0042752 | regulation of circadian rhythm |
| GO Biological Processes | GO:0097696 | receptor signaling pathway via STAT |
| GO Biological Processes | GO:0045184 | establishment of protein localization |
| GO Biological Processes | GO:0032787 | monocarboxylic acid metabolic process |
| GO Biological Processes | GO:0022411 | cellular component disassembly |
| GO Biological Processes | GO:0007399 | nervous system development |
| GO Biological Processes | GO:0007417 | central nervous system development |
| GO Biological Processes | GO:0006820 | anion transport |
| GO Biological Processes | GO:0010720 | positive regulation of cell development |
| GO Biological Processes | GO:0046890 | regulation of lipid biosynthetic process |
| GO Biological Processes | GO:0010389 | regulation of G2/M transition of mitotic cell cycle |
| GO Biological Processes | GO:0030512 | negative regulation of transforming growth factor beta receptor signaling pathway |
| GO Biological Processes | GO:0034103 | regulation of tissue remodeling |
| GO Biological Processes | GO:0046928 | regulation of neurotransmitter secretion |
| GO Biological Processes | GO:0048144 | fibroblast proliferation |
| GO Biological Processes | GO:0048145 | regulation of fibroblast proliferation |
| GO Biological Processes | GO:0050873 | brown fat cell differentiation |
| GO Biological Processes | GO:0070918 | primary sncRNA processing |
| GO Biological Processes | GO:0071867 | response to monoamine |
| GO Biological Processes | GO:0071868 | cellular response to monoamine stimulus |
| GO Biological Processes | GO:0071869 | response to catecholamine |
| GO Biological Processes | GO:0071870 | cellular response to catecholamine stimulus |
| GO Biological Processes | GO:1904427 | positive regulation of calcium ion transmembrane transport |
| GO Biological Processes | GO:0000082 | G1/S transition of mitotic cell cycle |
| GO Biological Processes | GO:0006275 | regulation of DNA replication |
| GO Biological Processes | GO:0007369 | gastrulation |
| GO Biological Processes | GO:0007565 | female pregnancy |
| GO Biological Processes | GO:0009746 | response to hexose |
| GO Biological Processes | GO:0033135 | regulation of peptidyl-serine phosphorylation |
| GO Biological Processes | GO:0034284 | response to monosaccharide |
| GO Biological Processes | GO:0034614 | cellular response to reactive oxygen species |
| GO Biological Processes | GO:0034767 | positive regulation of ion transmembrane transport |
| GO Biological Processes | GO:0042102 | positive regulation of T cell proliferation |
| GO Biological Processes | GO:0044703 | multi-organism reproductive process |
| GO Biological Processes | GO:0051100 | negative regulation of binding |
| GO Biological Processes | GO:0009895 | negative regulation of catabolic process |
| GO Biological Processes | GO:0019318 | hexose metabolic process |
| GO Biological Processes | GO:0002440 | production of molecular mediator of immune response |
| GO Biological Processes | GO:0006469 | negative regulation of protein kinase activity |
| GO Biological Processes | GO:0007204 | positive regulation of cytosolic calcium ion concentration |
| GO Biological Processes | GO:0042391 | regulation of membrane potential |
| GO Biological Processes | GO:0002702 | positive regulation of production of molecular mediator of immune response |
| GO Biological Processes | GO:0009743 | response to carbohydrate |
| GO Biological Processes | GO:0071621 | granulocyte chemotaxis |
| GO Biological Processes | GO:1990845 | adaptive thermogenesis |
| GO Biological Processes | GO:2000117 | negative regulation of cysteine-type endopeptidase activity |
| GO Biological Processes | GO:0071560 | cellular response to transforming growth factor beta stimulus |
| GO Biological Processes | GO:1903828 | negative regulation of protein localization |
| GO Biological Processes | GO:0006936 | muscle contraction |
| GO Biological Processes | GO:0001541 | ovarian follicle development |
| GO Biological Processes | GO:0002639 | positive regulation of immunoglobulin production |
| GO Biological Processes | GO:0006919 | activation of cysteine-type endopeptidase activity involved in apoptotic process |
| GO Biological Processes | GO:0032722 | positive regulation of chemokine production |
| GO Biological Processes | GO:0071346 | cellular response to interferon-gamma |
| GO Biological Processes | GO:0071347 | cellular response to interleukin-1 |
| GO Biological Processes | GO:1904892 | regulation of receptor signaling pathway via STAT |
| GO Biological Processes | GO:0031331 | positive regulation of cellular catabolic process |
| GO Biological Processes | GO:0048598 | embryonic morphogenesis |
| GO Biological Processes | GO:0044283 | small molecule biosynthetic process |
| GO Biological Processes | GO:0002573 | myeloid leukocyte differentiation |
| GO Biological Processes | GO:0051924 | regulation of calcium ion transport |
| GO Biological Processes | GO:0072593 | reactive oxygen species metabolic process |
| GO Biological Processes | GO:0002366 | leukocyte activation involved in immune response |
| GO Biological Processes | GO:0071706 | tumor necrosis factor superfamily cytokine production |
| GO Biological Processes | GO:1901991 | negative regulation of mitotic cell cycle phase transition |
| GO Biological Processes | GO:1903555 | regulation of tumor necrosis factor superfamily cytokine production |
| GO Biological Processes | GO:0010564 | regulation of cell cycle process |
| GO Biological Processes | GO:0034765 | regulation of ion transmembrane transport |
| GO Biological Processes | GO:0002263 | cell activation involved in immune response |
| GO Biological Processes | GO:0048511 | rhythmic process |
| GO Biological Processes | GO:0051604 | protein maturation |
| GO Biological Processes | GO:0046942 | carboxylic acid transport |
| GO Biological Processes | GO:0071559 | response to transforming growth factor beta |
| GO Biological Processes | GO:0051090 | regulation of DNA-binding transcription factor activity |
| GO Biological Processes | GO:0002287 | alpha-beta T cell activation involved in immune response |
| GO Biological Processes | GO:0002293 | alpha-beta T cell differentiation involved in immune response |
| GO Biological Processes | GO:0002294 | CD4-positive, alpha-beta T cell differentiation involved in immune response |
| GO Biological Processes | GO:0051053 | negative regulation of DNA metabolic process |
| GO Biological Processes | GO:0070265 | necrotic cell death |
| GO Biological Processes | GO:0090101 | negative regulation of transmembrane receptor protein serine/threonine kinase signaling pathway |
| GO Biological Processes | GO:0003014 | renal system process |
| GO Biological Processes | GO:0044706 | multi-multicellular organism process |
| GO Biological Processes | GO:0046631 | alpha-beta T cell activation |
| GO Biological Processes | GO:0060402 | calcium ion transport into cytosol |
| GO Biological Processes | GO:0005996 | monosaccharide metabolic process |
| GO Biological Processes | GO:1901987 | regulation of cell cycle phase transition |
| GO Biological Processes | GO:0044087 | regulation of cellular component biogenesis |
| GO Biological Processes | GO:0071407 | cellular response to organic cyclic compound |
| GO Biological Processes | GO:0006955 | immune response |
| GO Biological Processes | GO:0030098 | lymphocyte differentiation |
| GO Biological Processes | GO:0045165 | cell fate commitment |
| GO Biological Processes | GO:2001235 | positive regulation of apoptotic signaling pathway |
| GO Biological Processes | GO:0032409 | regulation of transporter activity |
| GO Biological Processes | GO:0033673 | negative regulation of kinase activity |
| GO Biological Processes | GO:0043393 | regulation of protein binding |
| GO Biological Processes | GO:0090287 | regulation of cellular response to growth factor stimulus |
| GO Biological Processes | GO:0048589 | developmental growth |
| GO Biological Processes | GO:0007423 | sensory organ development |
| GO Biological Processes | GO:0015718 | monocarboxylic acid transport |
| GO Biological Processes | GO:0016079 | synaptic vesicle exocytosis |
| GO Biological Processes | GO:0030641 | regulation of cellular pH |
| GO Biological Processes | GO:0034620 | cellular response to unfolded protein |
| GO Biological Processes | GO:0035637 | multicellular organismal signaling |
| GO Biological Processes | GO:0051279 | regulation of release of sequestered calcium ion into cytosol |
| GO Biological Processes | GO:0051588 | regulation of neurotransmitter transport |
| GO Biological Processes | GO:2000573 | positive regulation of DNA biosynthetic process |
| GO Biological Processes | GO:0080135 | regulation of cellular response to stress |
| GO Biological Processes | GO:0044092 | negative regulation of molecular function |
| GO Biological Processes | GO:0051248 | negative regulation of protein metabolic process |
| GO Biological Processes | GO:0060047 | heart contraction |
| GO Biological Processes | GO:0010959 | regulation of metal ion transport |
| GO Biological Processes | GO:0015711 | organic anion transport |
| GO Biological Processes | GO:0061041 | regulation of wound healing |
| GO Biological Processes | GO:0097193 | intrinsic apoptotic signaling pathway |
| GO Biological Processes | GO:0003015 | heart process |
| GO Biological Processes | GO:0045861 | negative regulation of proteolysis |
| GO Biological Processes | GO:0002292 | T cell differentiation involved in immune response |
| GO Biological Processes | GO:0002637 | regulation of immunoglobulin production |
| GO Biological Processes | GO:0002690 | positive regulation of leukocyte chemotaxis |
| GO Biological Processes | GO:0002695 | negative regulation of leukocyte activation |
| GO Biological Processes | GO:0031663 | lipopolysaccharide-mediated signaling pathway |
| GO Biological Processes | GO:0031960 | response to corticosteroid |
| GO Biological Processes | GO:0032602 | chemokine production |
| GO Biological Processes | GO:0032642 | regulation of chemokine production |
| GO Biological Processes | GO:0051341 | regulation of oxidoreductase activity |
| GO Biological Processes | GO:0071333 | cellular response to glucose stimulus |
| GO Biological Processes | GO:0006109 | regulation of carbohydrate metabolic process |
| GO Biological Processes | GO:0032869 | cellular response to insulin stimulus |
| GO Biological Processes | GO:0043409 | negative regulation of MAPK cascade |
| GO Biological Processes | GO:1901215 | negative regulation of neuron death |
| GO Biological Processes | GO:0048568 | embryonic organ development |
| GO Biological Processes | GO:0048608 | reproductive structure development |
| GO Biological Processes | GO:0061458 | reproductive system development |
| GO Biological Processes | GO:0044089 | positive regulation of cellular component biogenesis |
| GO Biological Processes | GO:0051960 | regulation of nervous system development |
| GO Biological Processes | GO:0005975 | carbohydrate metabolic process |
| GO Biological Processes | GO:0022008 | neurogenesis |
| GO Biological Processes | GO:0006836 | neurotransmitter transport |
| GO Biological Processes | GO:1903034 | regulation of response to wounding |
| GO Biological Processes | GO:1901565 | organonitrogen compound catabolic process |
| GO Biological Processes | GO:0008610 | lipid biosynthetic process |
| GO Biological Processes | GO:0015849 | organic acid transport |
| GO Biological Processes | GO:2001234 | negative regulation of apoptotic signaling pathway |
| GO Biological Processes | GO:0030097 | hemopoiesis |
| GO Biological Processes | GO:0007269 | neurotransmitter secretion |
| GO Biological Processes | GO:0034121 | regulation of toll-like receptor signaling pathway |
| GO Biological Processes | GO:0034341 | response to interferon-gamma |
| GO Biological Processes | GO:0034637 | cellular carbohydrate biosynthetic process |
| GO Biological Processes | GO:0034763 | negative regulation of transmembrane transport |
| GO Biological Processes | GO:0042310 | vasoconstriction |
| GO Biological Processes | GO:0045639 | positive regulation of myeloid cell differentiation |
| GO Biological Processes | GO:0071326 | cellular response to monosaccharide stimulus |
| GO Biological Processes | GO:0071331 | cellular response to hexose stimulus |
| GO Biological Processes | GO:0097006 | regulation of plasma lipoprotein particle levels |
| GO Biological Processes | GO:0099643 | signal release from synapse |
| GO Biological Processes | GO:0002697 | regulation of immune effector process |
| GO Biological Processes | GO:0071396 | cellular response to lipid |
| GO Biological Processes | GO:0032269 | negative regulation of cellular protein metabolic process |
| GO Biological Processes | GO:0002699 | positive regulation of immune effector process |
| GO Biological Processes | GO:0006898 | receptor-mediated endocytosis |
| GO Biological Processes | GO:0030217 | T cell differentiation |
| GO Biological Processes | GO:0070371 | ERK1 and ERK2 cascade |
| GO Biological Processes | GO:0001649 | osteoblast differentiation |
| GO Biological Processes | GO:0007179 | transforming growth factor beta receptor signaling pathway |
| GO Biological Processes | GO:0009266 | response to temperature stimulus |
| GO Biological Processes | GO:0060401 | cytosolic calcium ion transport |
| GO Biological Processes | GO:0097530 | granulocyte migration |
| GO Biological Processes | GO:0090066 | regulation of anatomical structure size |
| GO Biological Processes | GO:0044248 | cellular catabolic process |
| GO Biological Processes | GO:0006874 | cellular calcium ion homeostasis |
| GO Biological Processes | GO:0052548 | regulation of endopeptidase activity |
| GO Biological Processes | GO:0043542 | endothelial cell migration |
| GO Biological Processes | GO:0032102 | negative regulation of response to external stimulus |
| GO Biological Processes | GO:0051098 | regulation of binding |
| GO Biological Processes | GO:0006636 | unsaturated fatty acid biosynthetic process |
| GO Biological Processes | GO:0030593 | neutrophil chemotaxis |
| GO Biological Processes | GO:0050769 | positive regulation of neurogenesis |
| GO Biological Processes | GO:0071322 | cellular response to carbohydrate stimulus |
| GO Biological Processes | GO:1903557 | positive regulation of tumor necrosis factor superfamily cytokine production |
| GO Biological Processes | GO:2000045 | regulation of G1/S transition of mitotic cell cycle |
| GO Biological Processes | GO:0001818 | negative regulation of cytokine production |
| GO Biological Processes | GO:0071248 | cellular response to metal ion |
| GO Biological Processes | GO:0055074 | calcium ion homeostasis |
| GO Biological Processes | GO:0002237 | response to molecule of bacterial origin |
| GO Biological Processes | GO:0010506 | regulation of autophagy |
| GO Biological Processes | GO:0009790 | embryo development |
| GO Biological Processes | GO:0043086 | negative regulation of catalytic activity |
| GO Biological Processes | GO:1901615 | organic hydroxy compound metabolic process |
| GO Biological Processes | GO:0045930 | negative regulation of mitotic cell cycle |
| GO Biological Processes | GO:0090092 | regulation of transmembrane receptor protein serine/threonine kinase signaling pathway |
| GO Biological Processes | GO:0034504 | protein localization to nucleus |
| GO Biological Processes | GO:1901617 | organic hydroxy compound biosynthetic process |
| GO Biological Processes | GO:0002367 | cytokine production involved in immune response |
| GO Biological Processes | GO:0002718 | regulation of cytokine production involved in immune response |
| GO Biological Processes | GO:0016241 | regulation of macroautophagy |
| GO Biological Processes | GO:0035967 | cellular response to topologically incorrect protein |
| GO Biological Processes | GO:0043367 | CD4-positive, alpha-beta T cell differentiation |
| GO Biological Processes | GO:0071901 | negative regulation of protein serine/threonine kinase activity |
| GO Biological Processes | GO:0008202 | steroid metabolic process |
| GO Biological Processes | GO:0072503 | cellular divalent inorganic cation homeostasis |
| GO Biological Processes | GO:0008217 | regulation of blood pressure |
| GO Biological Processes | GO:0071222 | cellular response to lipopolysaccharide |
| GO Biological Processes | GO:0001654 | eye development |
| GO Biological Processes | GO:0006633 | fatty acid biosynthetic process |
| GO Biological Processes | GO:0010469 | regulation of signaling receptor activity |
| GO Biological Processes | GO:0019217 | regulation of fatty acid metabolic process |
| GO Biological Processes | GO:0022408 | negative regulation of cell-cell adhesion |
| GO Biological Processes | GO:0032755 | positive regulation of interleukin-6 production |
| GO Biological Processes | GO:0038127 | ERBB signaling pathway |
| GO Biological Processes | GO:0043280 | positive regulation of cysteine-type endopeptidase activity involved in apoptotic process |
| GO Biological Processes | GO:0045638 | negative regulation of myeloid cell differentiation |
| GO Biological Processes | GO:0050866 | negative regulation of cell activation |
| GO Biological Processes | GO:0051881 | regulation of mitochondrial membrane potential |
| GO Biological Processes | GO:1903305 | regulation of regulated secretory pathway |
| GO Biological Processes | GO:1904659 | glucose transmembrane transport |
| GO Biological Processes | GO:1905897 | regulation of response to endoplasmic reticulum stress |
| GO Biological Processes | GO:0055085 | transmembrane transport |
| GO Biological Processes | GO:0008016 | regulation of heart contraction |
| GO Biological Processes | GO:0008406 | gonad development |
| GO Biological Processes | GO:0008643 | carbohydrate transport |
| GO Biological Processes | GO:0043122 | regulation of I-kappaB kinase/NF-kappaB signaling |
| GO Biological Processes | GO:0045137 | development of primary sexual characteristics |
| GO Biological Processes | GO:0072507 | divalent inorganic cation homeostasis |
| GO Biological Processes | GO:0040007 | growth |
| GO Biological Processes | GO:0010629 | negative regulation of gene expression |
| GO Biological Processes | GO:0150063 | visual system development |
| GO Biological Processes | GO:2001020 | regulation of response to DNA damage stimulus |
| GO Biological Processes | GO:0030099 | myeloid cell differentiation |
| GO Biological Processes | GO:0032412 | regulation of ion transmembrane transporter activity |
| GO Biological Processes | GO:0045926 | negative regulation of growth |
| GO Biological Processes | GO:0055067 | monovalent inorganic cation homeostasis |
| GO Biological Processes | GO:0006606 | protein import into nucleus |
| GO Biological Processes | GO:0008645 | hexose transmembrane transport |
| GO Biological Processes | GO:0015749 | monosaccharide transmembrane transport |
| GO Biological Processes | GO:0019218 | regulation of steroid metabolic process |
| GO Biological Processes | GO:0021782 | glial cell development |
| GO Biological Processes | GO:0035195 | miRNA-mediated gene silencing |
| GO Biological Processes | GO:0051170 | import into nucleus |
| GO Biological Processes | GO:0062014 | negative regulation of small molecule metabolic process |
| GO Biological Processes | GO:0048880 | sensory system development |
| GO Biological Processes | GO:0015748 | organophosphate ester transport |
| GO Biological Processes | GO:0071241 | cellular response to inorganic substance |
| GO Biological Processes | GO:0002252 | immune effector process |
| GO Biological Processes | GO:0002377 | immunoglobulin production |
| GO Biological Processes | GO:0007093 | mitotic cell cycle checkpoint signaling |
| GO Biological Processes | GO:0008585 | female gonad development |
| GO Biological Processes | GO:0010906 | regulation of glucose metabolic process |
| GO Biological Processes | GO:0035194 | post-transcriptional gene silencing by RNA |
| GO Biological Processes | GO:0035710 | CD4-positive, alpha-beta T cell activation |
| GO Biological Processes | GO:0046545 | development of primary female sexual characteristics |
| GO Biological Processes | GO:0046632 | alpha-beta T cell differentiation |
| GO Biological Processes | GO:0046660 | female sex differentiation |
| GO Biological Processes | GO:0046889 | positive regulation of lipid biosynthetic process |
| GO Biological Processes | GO:0062207 | regulation of pattern recognition receptor signaling pathway |
| GO Biological Processes | GO:0072676 | lymphocyte migration |
| GO Biological Processes | GO:0006816 | calcium ion transport |
| GO Biological Processes | GO:0010563 | negative regulation of phosphorus metabolic process |
| GO Biological Processes | GO:0045936 | negative regulation of phosphate metabolic process |
| GO Biological Processes | GO:0071219 | cellular response to molecule of bacterial origin |
| GO Biological Processes | GO:1901988 | negative regulation of cell cycle phase transition |
| GO Biological Processes | GO:0006970 | response to osmotic stress |
| GO Biological Processes | GO:0007622 | rhythmic behavior |
| GO Biological Processes | GO:0010517 | regulation of phospholipase activity |
| GO Biological Processes | GO:0010939 | regulation of necrotic cell death |
| GO Biological Processes | GO:0014002 | astrocyte development |
| GO Biological Processes | GO:0014013 | regulation of gliogenesis |
| GO Biological Processes | GO:0016572 | histone phosphorylation |
| GO Biological Processes | GO:0022602 | ovulation cycle process |
| GO Biological Processes | GO:0030520 | intracellular estrogen receptor signaling pathway |
| GO Biological Processes | GO:0030574 | collagen catabolic process |
| GO Biological Processes | GO:0032370 | positive regulation of lipid transport |
| GO Biological Processes | GO:0034110 | regulation of homotypic cell-cell adhesion |
| GO Biological Processes | GO:0043903 | regulation of biological process involved in symbiotic interaction |
| GO Biological Processes | GO:0044070 | regulation of anion transport |
| GO Biological Processes | GO:0045740 | positive regulation of DNA replication |
| GO Biological Processes | GO:0046323 | glucose import |
| GO Biological Processes | GO:0048246 | macrophage chemotaxis |
| GO Biological Processes | GO:0048512 | circadian behavior |
| GO Biological Processes | GO:0048538 | thymus development |
| GO Biological Processes | GO:0048662 | negative regulation of smooth muscle cell proliferation |
| GO Biological Processes | GO:2000107 | negative regulation of leukocyte apoptotic process |
| GO Biological Processes | GO:0050877 | nervous system process |
| GO Biological Processes | GO:0010594 | regulation of endothelial cell migration |
| GO Biological Processes | GO:0016051 | carbohydrate biosynthetic process |
| GO Biological Processes | GO:0090596 | sensory organ morphogenesis |
| GO Biological Processes | GO:2000241 | regulation of reproductive process |
| GO Biological Processes | GO:0010822 | positive regulation of mitochondrion organization |
| GO Biological Processes | GO:0016441 | post-transcriptional gene silencing |
| GO Biological Processes | GO:0044264 | cellular polysaccharide metabolic process |
| GO Biological Processes | GO:0051209 | release of sequestered calcium ion into cytosol |
| GO Biological Processes | GO:1990266 | neutrophil migration |
| GO Biological Processes | GO:2001056 | positive regulation of cysteine-type endopeptidase activity |
| GO Biological Processes | GO:0060341 | regulation of cellular localization |
| GO Biological Processes | GO:0001933 | negative regulation of protein phosphorylation |
| GO Biological Processes | GO:0007623 | circadian rhythm |
| GO Biological Processes | GO:0010821 | regulation of mitochondrion organization |
| GO Biological Processes | GO:0098869 | cellular oxidant detoxification |
| GO Biological Processes | GO:0031349 | positive regulation of defense response |
| GO Biological Processes | GO:0000723 | telomere maintenance |
| GO Biological Processes | GO:0009408 | response to heat |
| GO Biological Processes | GO:0010675 | regulation of cellular carbohydrate metabolic process |
| GO Biological Processes | GO:0015914 | phospholipid transport |
| GO Biological Processes | GO:0030278 | regulation of ossification |
| GO Biological Processes | GO:0032200 | telomere organization |
| GO Biological Processes | GO:0044409 | entry into host |
| GO Biological Processes | GO:0051592 | response to calcium ion |
| GO Biological Processes | GO:0097553 | calcium ion transmembrane import into cytosol |
| GO Biological Processes | GO:1902806 | regulation of cell cycle G1/S phase transition |
| GO Biological Processes | GO:0001960 | negative regulation of cytokine-mediated signaling pathway |
| GO Biological Processes | GO:0006801 | superoxide metabolic process |
| GO Biological Processes | GO:0006984 | ER-nucleus signaling pathway |
| GO Biological Processes | GO:0010812 | negative regulation of cell-substrate adhesion |
| GO Biological Processes | GO:0032941 | secretion by tissue |
| GO Biological Processes | GO:0032964 | collagen biosynthetic process |
| GO Biological Processes | GO:0042149 | cellular response to glucose starvation |
| GO Biological Processes | GO:0043470 | regulation of carbohydrate catabolic process |
| GO Biological Processes | GO:0051937 | catecholamine transport |
| GO Biological Processes | GO:0060260 | regulation of transcription initiation from RNA polymerase II promoter |
| GO Biological Processes | GO:0061180 | mammary gland epithelium development |
| GO Biological Processes | GO:0061337 | cardiac conduction |
| GO Biological Processes | GO:1904994 | regulation of leukocyte adhesion to vascular endothelial cell |
| GO Biological Processes | GO:2000142 | regulation of DNA-templated transcription, initiation |
| GO Biological Processes | GO:0007548 | sex differentiation |
| GO Biological Processes | GO:0022898 | regulation of transmembrane transporter activity |
| GO Biological Processes | GO:0031330 | negative regulation of cellular catabolic process |
| GO Biological Processes | GO:0043491 | protein kinase B signaling |
| GO Biological Processes | GO:0048762 | mesenchymal cell differentiation |
| GO Biological Processes | GO:0051651 | maintenance of location in cell |
| GO Biological Processes | GO:0060627 | regulation of vesicle-mediated transport |
| GO Biological Processes | GO:0030163 | protein catabolic process |
| GO Biological Processes | GO:0050776 | regulation of immune response |

**Supplementary Table 8.** One hundred and sixty-six pathways were enriched by KEGG

| NO. | ID | Description | Count |
| --- | --- | --- | --- |
| 1 | bta04933 | AGE-RAGE signaling pathway in diabetic complications | 27 |
| 2 | bta05417 | Lipid and atherosclerosis | 32 |
| 3 | bta05418 | Fluid shear stress and atherosclerosis | 23 |
| 4 | bta05161 | Hepatitis B | 22 |
| 5 | bta05163 | Human cytomegalovirus infection | 25 |
| 6 | bta04657 | IL-17 signaling pathway | 17 |
| 7 | bta05205 | Proteoglycans in cancer | 22 |
| 8 | bta05164 | Influenza A | 20 |
| 9 | bta05160 | Hepatitis C | 19 |
| 10 | bta05222 | Small cell lung cancer | 15 |
| 11 | bta05167 | Kaposi sarcoma-associated herpesvirus infection | 21 |
| 12 | bta05219 | Bladder cancer | 11 |
| 13 | bta04218 | Cellular senescence | 18 |
| 14 | bta04668 | TNF signaling pathway | 16 |
| 15 | bta05142 | Chagas disease | 15 |
| 16 | bta04625 | C-type lectin receptor signaling pathway | 14 |
| 17 | bta04660 | T cell receptor signaling pathway | 14 |
| 18 | bta04151 | PI3K-Akt signaling pathway | 24 |
| 19 | bta05145 | Toxoplasmosis | 14 |
| 20 | bta05144 | Malaria | 11 |
| 21 | bta05169 | Epstein-Barr virus infection | 19 |
| 22 | bta05162 | Measles | 16 |
| 23 | bta05215 | Prostate cancer | 13 |
| 24 | bta04115 | p53 signaling pathway | 12 |
| 25 | bta04066 | HIF-1 signaling pathway | 13 |
| 26 | bta01522 | Endocrine resistance | 12 |
| 27 | bta05212 | Pancreatic cancer | 11 |
| 28 | bta04659 | Th17 cell differentiation | 13 |
| 29 | bta05146 | Amoebiasis | 13 |
| 30 | bta04210 | Apoptosis | 14 |
| 31 | bta04010 | MAPK signaling pathway | 19 |
| 32 | bta05152 | Tuberculosis | 16 |
| 33 | bta04068 | FoxO signaling pathway | 13 |
| 34 | bta04926 | Relaxin signaling pathway | 13 |
| 35 | bta05166 | Human T-cell leukemia virus 1 infection | 17 |
| 36 | bta05210 | Colorectal cancer | 11 |
| 37 | bta05321 | Inflammatory bowel disease | 10 |
| 38 | bta05223 | Non-small cell lung cancer | 10 |
| 39 | bta04620 | Toll-like receptor signaling pathway | 12 |
| 40 | bta04370 | VEGF signaling pathway | 9 |
| 41 | bta05220 | Chronic myeloid leukemia | 10 |
| 42 | bta05133 | Pertussis | 10 |
| 43 | bta05140 | Leishmaniasis | 10 |
| 44 | bta05143 | African trypanosomiasis | 8 |
| 45 | bta05206 | MicroRNAs in cancer | 18 |
| 46 | bta01521 | EGFR tyrosine kinase inhibitor resistance | 10 |
| 47 | bta04936 | Alcoholic liver disease | 13 |
| 48 | bta05323 | Rheumatoid arthritis | 11 |
| 49 | bta05135 | Yersinia infection | 13 |
| 50 | bta05207 | Chemical carcinogenesis - receptor activation | 15 |
| 51 | bta05221 | Acute myeloid leukemia | 9 |
| 52 | bta04064 | NF-kappa B signaling pathway | 11 |
| 53 | bta05165 | Human papillomavirus infection | 19 |
| 54 | bta04380 | Osteoclast differentiation | 12 |
| 55 | bta04915 | Estrogen signaling pathway | 12 |
| 56 | bta05235 | PD-L1 expression and PD-1 checkpoint pathway in cancer | 10 |
| 57 | bta04071 | Sphingolipid signaling pathway | 11 |
| 58 | bta05225 | Hepatocellular carcinoma | 13 |
| 59 | bta05170 | Human immunodeficiency virus 1 infection | 15 |
| 60 | bta04932 | Non-alcoholic fatty liver disease | 12 |
| 61 | bta05132 | Salmonella infection | 15 |
| 62 | bta05022 | Pathways of neurodegeneration - multiple diseases | 21 |
| 63 | bta01523 | Antifolate resistance | 7 |
| 64 | bta05208 | Chemical carcinogenesis - reactive oxygen species | 14 |
| 65 | bta04061 | Viral protein interaction with cytokine and cytokine receptor | 9 |
| 66 | bta04726 | Serotonergic synapse | 10 |
| 67 | bta05218 | Melanoma | 8 |
| 68 | bta04152 | AMPK signaling pathway | 10 |
| 69 | bta05020 | Prion disease | 15 |
| 70 | bta05214 | Glioma | 8 |
| 71 | bta04020 | Calcium signaling pathway | 14 |
| 72 | bta01524 | Platinum drug resistance | 8 |
| 73 | bta05010 | Alzheimer disease | 18 |
| 74 | bta04062 | Chemokine signaling pathway | 12 |
| 75 | bta05134 | Legionellosis | 7 |
| 76 | bta05213 | Endometrial cancer | 7 |
| 77 | bta05216 | Thyroid cancer | 6 |
| 78 | bta04917 | Prolactin signaling pathway | 8 |
| 79 | bta05202 | Transcriptional misregulation in cancer | 12 |
| 80 | bta04510 | Focal adhesion | 12 |
| 81 | bta04022 | cGMP-PKG signaling pathway | 11 |
| 82 | bta04914 | Progesterone-mediated oocyte maturation | 8 |
| 83 | bta04540 | Gap junction | 8 |
| 84 | bta05230 | Central carbon metabolism in cancer | 7 |
| 85 | bta05224 | Breast cancer | 10 |
| 86 | bta04919 | Thyroid hormone signaling pathway | 9 |
| 87 | bta05415 | Diabetic cardiomyopathy | 12 |
| 88 | bta00330 | Arginine and proline metabolism | 6 |
| 89 | bta05226 | Gastric cancer | 10 |
| 90 | bta04920 | Adipocytokine signaling pathway | 7 |
| 91 | bta04110 | Cell cycle | 9 |
| 92 | bta04658 | Th1 and Th2 cell differentiation | 8 |
| 93 | bta04621 | NOD-like receptor signaling pathway | 11 |
| 94 | bta04215 | Apoptosis - multiple species | 5 |
| 95 | bta04728 | Dopaminergic synapse | 9 |
| 96 | bta05330 | Allograft rejection | 6 |
| 97 | bta04931 | Insulin resistance | 8 |
| 98 | bta04371 | Apelin signaling pathway | 9 |
| 99 | bta04923 | Regulation of lipolysis in adipocytes | 6 |
| 100 | bta05012 | Parkinson disease | 13 |
| 101 | bta05171 | Coronavirus disease - COVID-19 | 13 |
| 102 | bta04024 | cAMP signaling pathway | 12 |
| 103 | bta04725 | Cholinergic synapse | 8 |
| 104 | bta04630 | JAK-STAT signaling pathway | 11 |
| 105 | bta04662 | B cell receptor signaling pathway | 7 |
| 106 | bta04217 | Necroptosis | 10 |
| 107 | bta04060 | Cytokine-cytokine receptor interaction | 14 |
| 108 | bta04929 | GnRH secretion | 6 |
| 109 | bta05332 | Graft-versus-host disease | 6 |
| 110 | bta04650 | Natural killer cell mediated cytotoxicity | 9 |
| 111 | bta05031 | Amphetamine addiction | 6 |
| 112 | bta04664 | Fc epsilon RI signaling pathway | 6 |
| 113 | bta04930 | Type II diabetes mellitus | 5 |
| 114 | bta05211 | Renal cell carcinoma | 6 |
| 115 | bta05030 | Cocaine addiction | 5 |
| 116 | bta04623 | Cytosolic DNA-sensing pathway | 6 |
| 117 | bta04910 | Insulin signaling pathway | 8 |
| 118 | bta05416 | Viral myocarditis | 6 |
| 119 | bta03320 | PPAR signaling pathway | 6 |
| 120 | bta04672 | Intestinal immune network for IgA production | 5 |
| 121 | bta04080 | Neuroactive ligand-receptor interaction | 14 |
| 122 | bta04921 | Oxytocin signaling pathway | 8 |
| 123 | bta04940 | Type I diabetes mellitus | 5 |
| 124 | bta04211 | Longevity regulating pathway | 6 |
| 125 | bta04722 | Neurotrophin signaling pathway | 7 |
| 126 | bta04610 | Complement and coagulation cascades | 6 |
| 127 | bta00350 | Tyrosine metabolism | 4 |
| 128 | bta05310 | Asthma | 4 |
| 129 | bta05203 | Viral carcinogenesis | 10 |
| 130 | bta05168 | Herpes simplex virus 1 infection | 14 |
| 131 | bta00220 | Arginine biosynthesis | 3 |
| 132 | bta04014 | Ras signaling pathway | 10 |
| 133 | bta00360 | Phenylalanine metabolism | 3 |
| 134 | bta04640 | Hematopoietic cell lineage | 6 |
| 135 | bta04670 | Leukocyte transendothelial migration | 6 |
| 136 | bta04261 | Adrenergic signaling in cardiomyocytes | 7 |
| 137 | bta04012 | ErbB signaling pathway | 5 |
| 138 | bta04935 | Growth hormone synthesis, secretion and action | 6 |
| 139 | bta04150 | mTOR signaling pathway | 7 |
| 140 | bta04611 | Platelet activation | 6 |
| 141 | bta05014 | Amyotrophic lateral sclerosis | 12 |
| 142 | bta04666 | Fc gamma R-mediated phagocytosis | 5 |
| 143 | bta05231 | Choline metabolism in cancer | 5 |
| 144 | bta04970 | Salivary secretion | 5 |
| 145 | bta04720 | Long-term potentiation | 4 |
| 146 | bta04928 | Parathyroid hormone synthesis, secretion and action | 5 |
| 147 | bta04140 | Autophagy - animal | 6 |
| 148 | bta05034 | Alcoholism | 8 |
| 149 | bta04622 | RIG-I-like receptor signaling pathway | 5 |
| 150 | bta05320 | Autoimmune thyroid disease | 4 |
| 151 | bta00061 | Fatty acid biosynthesis | 2 |
| 152 | bta04114 | Oocyte meiosis | 5 |
| 153 | bta00380 | Tryptophan metabolism | 3 |
| 154 | bta00590 | Arachidonic acid metabolism | 4 |
| 155 | bta04146 | Peroxisome | 4 |
| 156 | bta04310 | Wnt signaling pathway | 6 |
| 157 | bta04015 | Rap1 signaling pathway | 7 |
| 158 | bta04512 | ECM-receptor interaction | 4 |
| 159 | bta00340 | Histidine metabolism | 2 |
| 160 | bta04612 | Antigen processing and presentation | 4 |
| 161 | bta05032 | Morphine addiction | 4 |
| 162 | bta04360 | Axon guidance | 6 |
| 163 | bta04912 | GnRH signaling pathway | 4 |
| 164 | bta04810 | Regulation of actin cytoskeleton | 7 |
| 165 | bta04350 | TGF-beta signaling pathway | 4 |
| 166 | bta01212 | Fatty acid metabolism | 3 |

**Supplementary Table 9.** The Ramachandran plot values of the IL6 and IL10 model obtained using PROCHECK

| **Ramachandran plot value** | **Percentage of residues**  **Degree** | |
| --- | --- | --- |
| **IL6** | **IL10** |
| Most favoured regions | 75.8% | 92.3% |
| Additional allowed regions | 21.6% | 4.9% |
| Generously allowed regions | 2.0% | 2.8% |
| Disallowed regions | 0.7% | 0.0% |

**Supplementary Table 10.** The results of average daily gain, lung index and spleen index

| Index namen | Con | Mod | DSYXD | Dox |
| --- | --- | --- | --- | --- |
| Average daily gain (kg) | 1.89±0.35 | 0.21±0.27 | 0.57±0.11 | 0.45±0.05 |
| Lung index (%) | 1.1254±0.113 | 2.1641±0.104 | 1.5111±0.077 | 1.6301±0.138 |
| Spleen index (%) | 0.2196±0.020 | 0.2749±0.009 | 0.2387±0.008 | 0.1955±0.011 |

Notes: All values are listed with mean ± SD.

## Supplementary Figures


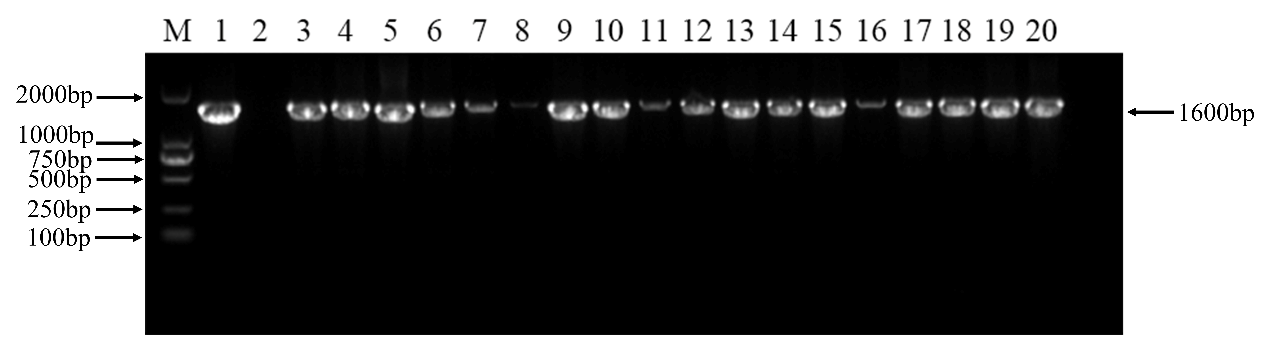


**Supplementary Figure 1.** UvrC primer PCR amplification results (M. DNA Marker DL 2000; 1. Positive control; 2. Negative control; 3~20. The nasal swab DNA-amplified products of pathology model calves)


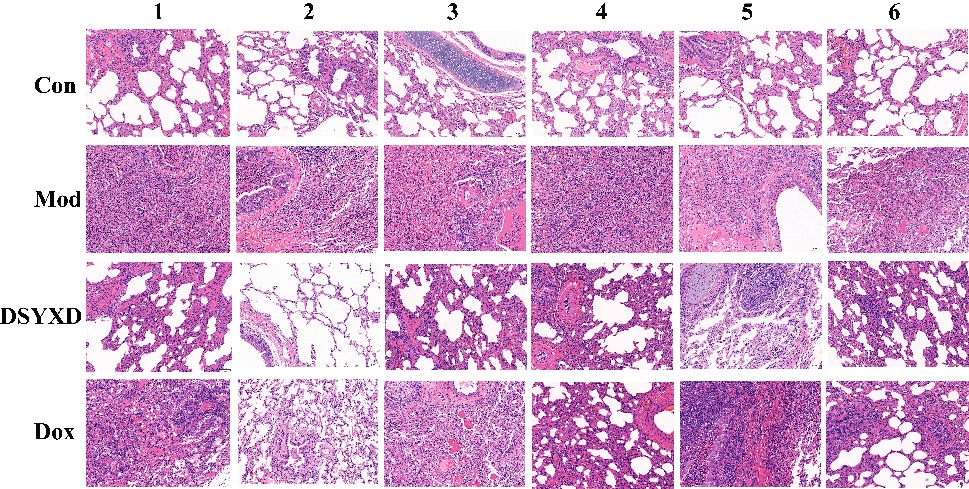


**Supplementary Figure 2.** HE staining of lung tissues (×200) [Control group (Con); model group (Mod); Dang-Shen-Yu-Xing decoction group (DSYXD); doxycycline group (Dox)]
